# Supplementary material for: Reconstitution of monoterpene indole alkaloid biosynthesis in genome engineered Nicotiana benthamiana
Source: PubMed Central journal article supplement (PMC9464250; doi:10.1038/s42003-022-03904-w), 2022-09-10
Supplement: 42003_2022_3904_MOESM1_ESM.pdf [file 42003_2022_3904_MOESM1_ESM.pdf]

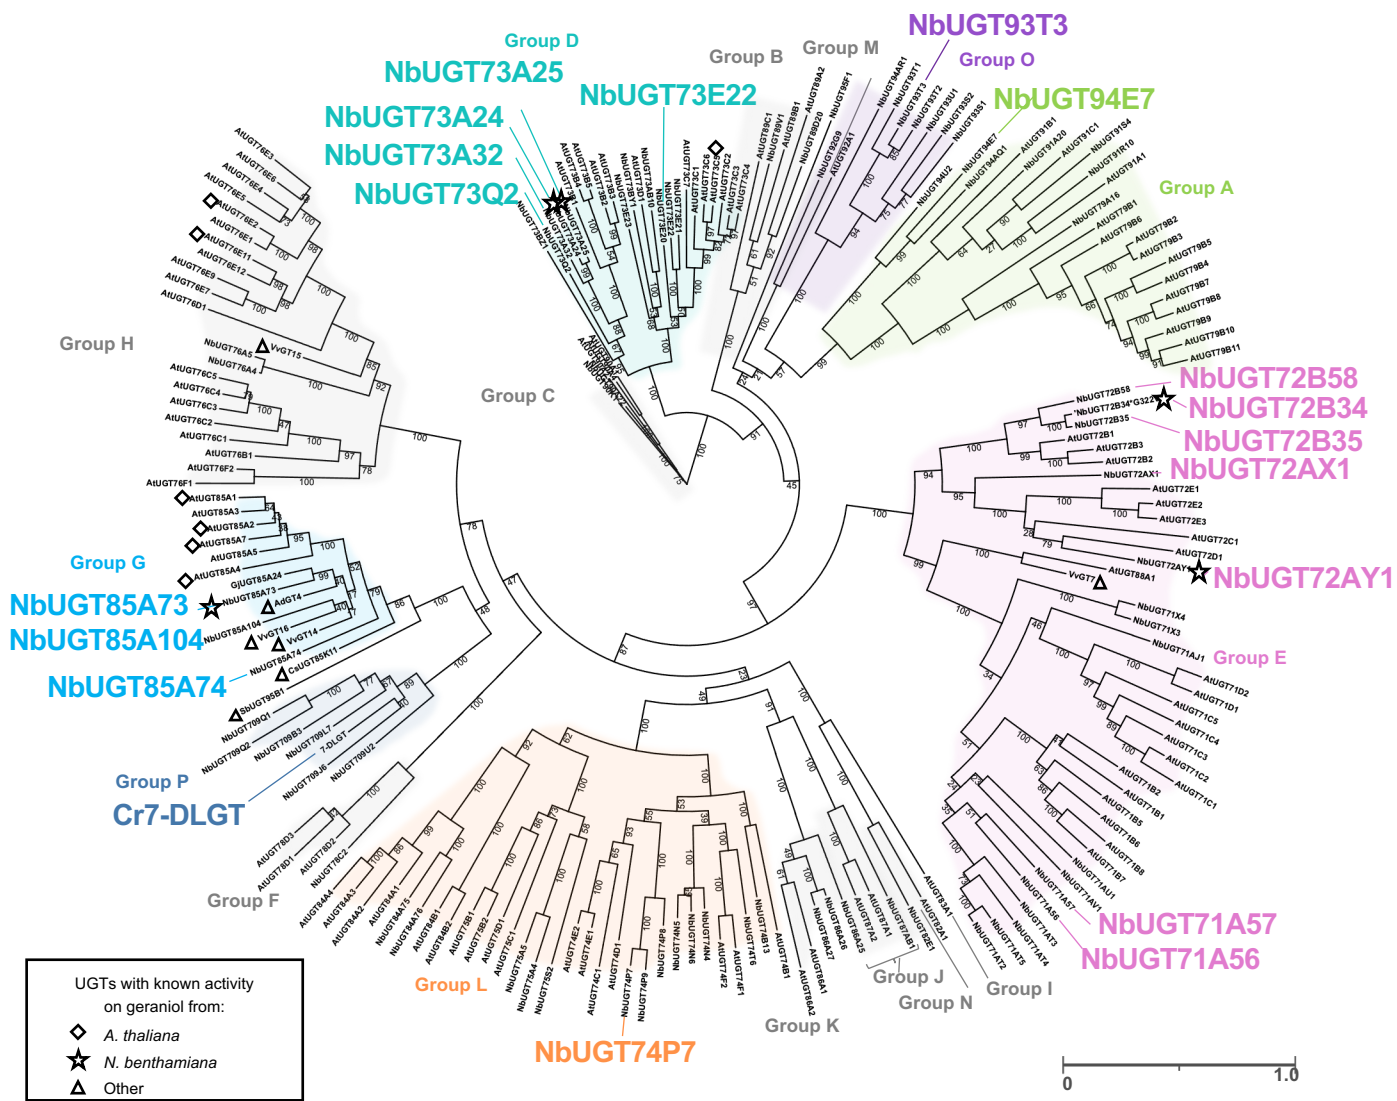

**Supplementary Figure 1. Maximum likelihood (RAxML) phylogenetic comparison of 193 Family 1 UDP-glycosyltransferases (UGTs).** Sequences are from *N. benthamiana*, *A. thaliana* plus nine UGTs previously shown to be active on geraniol or iridoid substrates. Groups A-P are annotated according to the nomenclature used by Caputi et al 2011. Labeled taxa indicate enzymes in which Cas9-mediated targeted mutations were subsequently introduced. Numbers at nodes are bootstrap support. Scale bar indicates the number of substitutions per site.

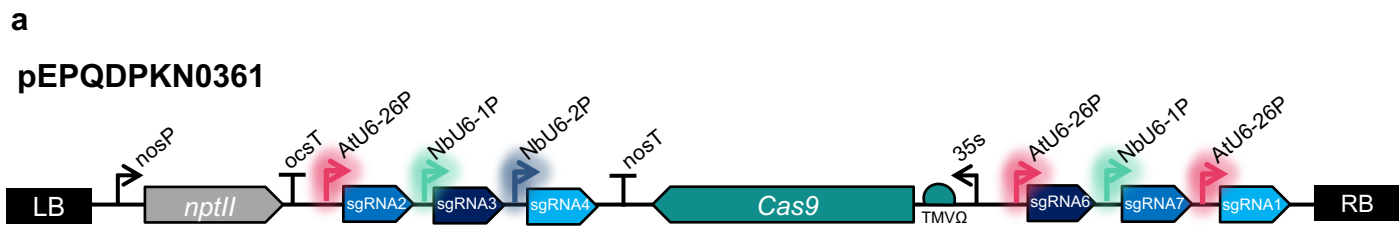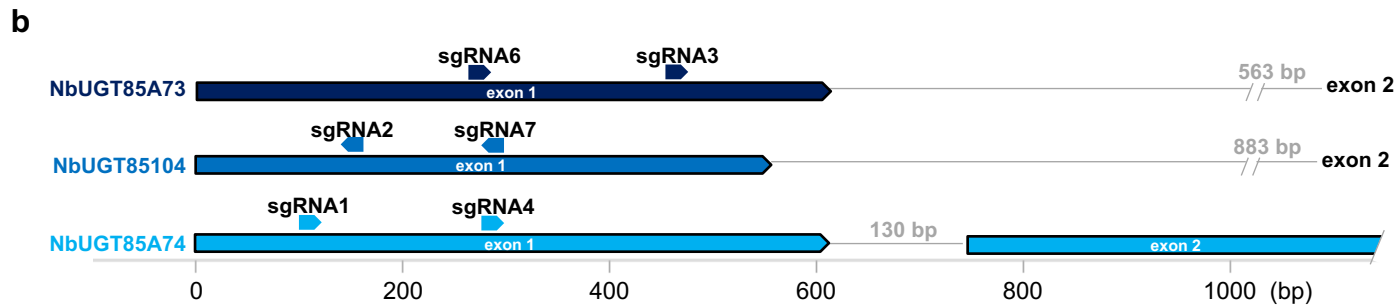

**c**

| NbUGT85A73        |                                                                                                                           |                                                                                     |       |
|-------------------|---------------------------------------------------------------------------------------------------------------------------|-------------------------------------------------------------------------------------|-------|
| Plant line        | sgRNA6                                                                                                                    | sgRNA3                                                                              | T-DNA |
|                   | GAGAAATGGGTTCTGT-TGAAGGG                                                                                                  | ACCCGTCTCGTGCATCG-TGTCCG                                                            |       |
| <b>0361-34-05</b> | <b>bi-allelic</b><br>CGTGGCCCTGATTCTCTTCAAGGG<br>CGTGGCCCTGAT-----TCAAGGG<br>frameshift at aa63 and stop<br>codon at aa71 | <b>homozygous</b><br>ACCCGTCTCGTGCATCGTGTCCG<br>sequence remains out of frame       | -     |
| <b>0361-34-08</b> | <b>homozygous</b><br>CGTGGCCCTGAT-----TCAAGGG<br>frameshift resulting in incorrect<br>sequence from aa62 -125             | <b>homozygous</b><br>ACCCGTCTCGTGCATCGTGTCCG<br>sequence back in frame from<br>S126 | +     |

  

| NbUGT85A104       |                                                                                              |                                                                               |       |
|-------------------|----------------------------------------------------------------------------------------------|-------------------------------------------------------------------------------|-------|
| Plant line        | sgRNA2                                                                                       | sgRNA7                                                                        | T-DNA |
|                   | CCTCCATAT-ACGAGGCTTTCATA                                                                     | CCCTC-TAACGATGACGCGACACA                                                      |       |
| <b>0361-34-05</b> | <b>homozygous</b><br>CCTCCATATACGAGGCTTTCATA<br>frameshift at aa40 and stop<br>codon at aa50 | <b>homozygous</b><br>CCCTCTAACGATGACGCGACACA<br>sequence remains out of frame | -     |
| <b>0361-34-08</b> | <b>homozygous</b><br>CCTCCATATACGAGGCTTTCATA<br>frameshift at aa40 and stop<br>codon at aa50 | <b>homozygous</b><br>CCCTCTAACGATGACGCGACACA<br>sequence remains out of frame | +     |

  

| NbUGT85A74        |                                                                                                                         |                                                        |       |
|-------------------|-------------------------------------------------------------------------------------------------------------------------|--------------------------------------------------------|-------|
| Plant line        | sgRNA1                                                                                                                  | sgRNA4                                                 | T-DNA |
|                   | GAGAAATGGGTTCTGTT-GAAAGGG                                                                                               | AGAGGACCTTATTCTCTTAAAGG                                |       |
| <b>0361-34-05</b> | <b>bi-allelic</b><br>GAGAAATGGGTTCTGTTCAAGGG<br>GAGAAATGGGTTCTGTTAGAAGGG<br>frameshift at aa5 and stop<br>codon at aa47 | <b>wild type</b><br>AGAGGACCTTATTCTCTTAAAGG<br><br>n/a | -     |
| <b>0361-34-08</b> | <b>homozygous</b><br>GAGAAATGGGTTCTGTTAGAAGGG<br>frameshift at aa5 and stop<br>codon at aa47                            | <b>wild type</b><br>AGAGGACCTTATTCTCTTAAAGG<br><br>n/a | +     |

**Supplementary Figure 2. Cas9-mediated mutagenesis of three Group G UGTs** (a) Schematic showing construct design (b) locations of sgRNAs (c) sequences of targets and genotypes of T1 plants

**a**

**pEPQDPKN0720**

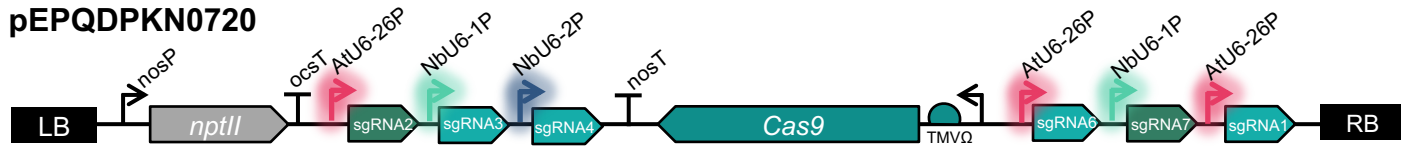

**b**

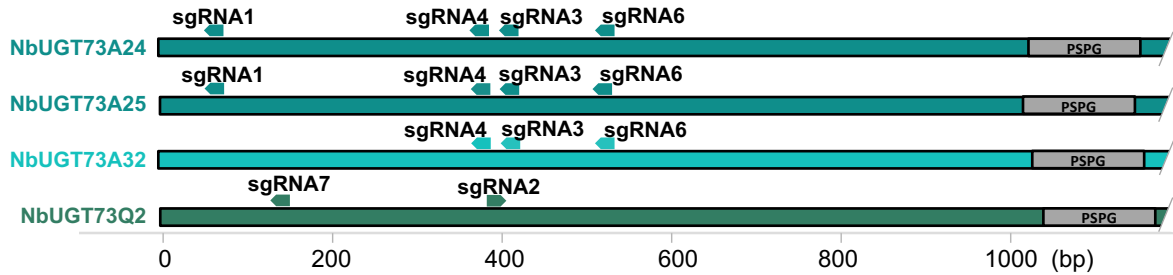

**c**

| NbUGT73A24 |                                                                                                                        |                                      |                                                                               |                                                                              |       |
|------------|------------------------------------------------------------------------------------------------------------------------|--------------------------------------|-------------------------------------------------------------------------------|------------------------------------------------------------------------------|-------|
| Plant line | sgRNA1                                                                                                                 | sgRNA4                               | sgRNA3                                                                        | sgRNA6                                                                       | T-DNA |
|            | CCTACACTAGACATGGCGAAGCT                                                                                                | CCTGGACTACTGATTCTGCAGC               | CCGAGAATAGTTTTCCATGGCAC                                                       | CCGAA-TTTGCCTCAGAAATTA                                                       |       |
| 0720-06-01 | <b>homozygous</b><br>CCTACA-----<br>319 bp deletion from sgRNA1 to sgRNA4 deleting aa21-126 and introducing frameshift | <b>homozygous</b><br>-----ATTCTGCAGC | <b>homozygous</b><br>CCGAG---AGTTTTCCATGGCAC<br>sequence remains out of frame | <b>homozygous</b><br>CCGAA-TTTGCCTCAGAAATTA<br>sequence remains out of frame | -     |
| 0720-06-03 | <b>homozygous</b><br>CCTACA-----<br>319 bp deletion from sgRNA1 to sgRNA4 deleting aa21-126 and introducing frameshift | <b>homozygous</b><br>-----ATTCTGCAGC | <b>homozygous</b><br>CCGAG---AGTTTTCCATGGCAC<br>sequence remains out of frame | <b>homozygous</b><br>CCGAA-TTTGCCTCAGAAATTA<br>sequence remains out of frame | +     |

  

| NbUGT73A25 |                                                                                                                                    |                                                                             |                                                                                                        |                                                                              |       |
|------------|------------------------------------------------------------------------------------------------------------------------------------|-----------------------------------------------------------------------------|--------------------------------------------------------------------------------------------------------|------------------------------------------------------------------------------|-------|
| Plant line | sgRNA1                                                                                                                             | sgRNA4                                                                      | sgRNA3                                                                                                 | sgRNA6                                                                       | T-DNA |
|            | CCTACA-CTAGACATGGCGAAGCT                                                                                                           | CCTGGACTACTGATTCTGCAGC                                                      | CCGAGAATAGTTTTCCATGGCAC                                                                                | CCGAA-TTTGCCTCAGAAATTA                                                       |       |
| 0720-06-01 | <b>bi-allelic</b><br>CCTACA <b>C</b> CTAGACATGGCGAAGCT<br>CCTACA---AGACATGGCGAAGCT<br>frameshift from aa21 and stop codon at aa 32 | <b>wild type</b><br>CCTGGACTACTGATAGTGCAGC<br>sequence remains out of frame | <b>bi-allelic</b><br>CCGAGAA-----TCCATGGCACAAAGCTTC<br>CCGAGA-----TTC<br>sequence remains out of frame | <b>homozygous</b><br>CCGAA-TTTGCCTCAGAAATTA<br>sequence remains out of frame | -     |
| 0720-06-03 | <b>homozygous</b><br>CCTACA <b>C</b> CTAGACATGGCGAAGCT<br>frameshift from aa21 and stop codon at aa 33                             | <b>wild type</b><br>CCTGGACTACTGATAGTGCAGC<br>sequence remains out of frame | <b>homozygous</b><br>CCGAGAA-----TCCATGGCACAAAGCTTC<br>sequence remains out of frame                   | <b>homozygous</b><br>CCGAA-TTTGCCTCAGAAATTA<br>sequence remains out of frame | +     |

  

| NbUGT73A32 |                                                                                             |                                                                              |                                                                             |       |  |
|------------|---------------------------------------------------------------------------------------------|------------------------------------------------------------------------------|-----------------------------------------------------------------------------|-------|--|
| Plant line | sgRNA4                                                                                      | sgRNA3                                                                       | sgRNA6                                                                      | T-DNA |  |
|            | CCTGGACTACTGATTCTGCAGC                                                                      | CCGAGAATAGTTTT <b>CATGGTAC</b>                                               | CCGAA-TTTGCCTCAGAAATTA                                                      |       |  |
| 0720-06-01 | <b>homozygous</b><br>CCTTG-----GATTCTGCAGC<br>frameshift from aa125 and stop codon at aa135 | <b>wild type</b><br>CCAAGAATAGTTTTTCATGGTAC<br>sequence remains out of frame | <b>wild type</b><br>CCTAATTTGCCTCAGAAATCAA<br>sequence remains out of frame | -     |  |
| 0720-06-03 | <b>homozygous</b><br>CCTTG-----GATTCTGCAGC<br>frameshift from aa125 and stop codon at aa135 | <b>wild type</b><br>CCAAGAATAGTTTTTCATGGTAC<br>sequence remains out of frame | <b>wild type</b><br>CCTAATTTGCCTCAGAAATCAA<br>sequence remains out of frame | +     |  |

  

| NbUGT73Q2  |                                                                                                      |                                                                                        |       |  |  |
|------------|------------------------------------------------------------------------------------------------------|----------------------------------------------------------------------------------------|-------|--|--|
| Plant line | sgRNA7                                                                                               | sgRNA2                                                                                 | T-DNA |  |  |
|            | CCTCTC-AACGCACCTAAATCTC                                                                              | GTTGACGTTGCAGCC-AAAGCTGGG                                                              |       |  |  |
| 0720-06-01 | <b>homozygous</b><br>CCTCTC <b>A</b> AACGCACCTAAATCTC<br>frameshift from aa42 and stop codon at aa49 | <b>homozygous</b><br>GTTGACGTTGCAGCC <b>A</b> AGCTGGG<br>sequence remains out of frame | -     |  |  |
| 0720-06-03 | <b>homozygous</b><br>CCTCTC <b>A</b> AACGCACCTAAATCTC<br>frameshift from aa42 and stop codon at aa49 | <b>homozygous</b><br>GTTGACGTTGCAGCC <b>A</b> AGCTGGG<br>sequence remains out of frame | +     |  |  |

**Supplementary Figure 3. Cas9-mediated mutagenesis of four Group D UGTs (a) Schematic showing construct design (b) locations of sgRNAs (c) sequences of targets and genotypes of T1 plants**

a

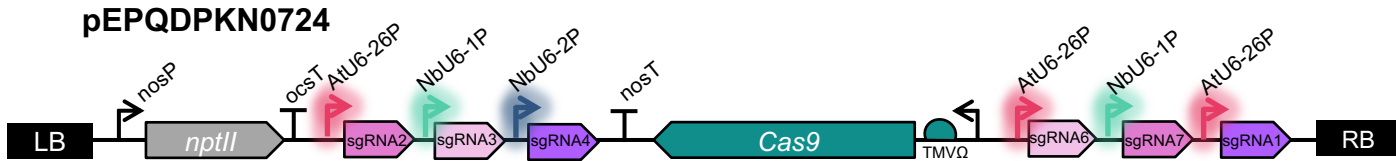

b

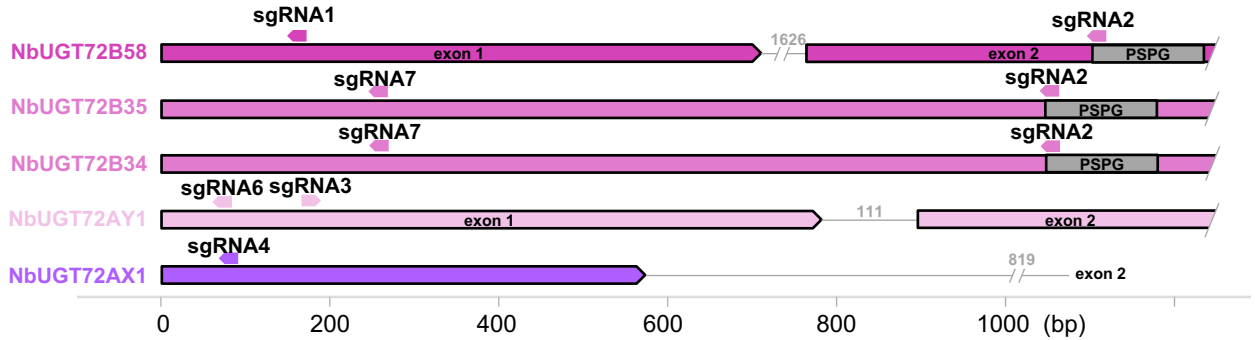

c

| NbUGT72B58  |                                                                                                                      |                                                |       |
|-------------|----------------------------------------------------------------------------------------------------------------------|------------------------------------------------|-------|
| Plant line  | sgRNA1                                                                                                               | sgRNA2                                         | T-DNA |
| 0724-37-06  | CCTACTAACGGTCCCCTCTCTAA<br>homozygous<br>frameshift at aa52 and stop codon at aa57                                   | CCTAATTGGGCCCCACAAGCCAAATC<br>wild type<br>n/a | -     |
| 0724-22a-06 | CCTACT---GGTCCCCTCTCTAA<br>homozygous<br>3 bp in-frame deletion of aa52 (not considered a loss-of-function mutation) | CCTAATTGGGCCCCACAAGCCAAATC<br>wild type<br>n/a | +     |

| NbUGT72B35  |                                             |                                                                                         |       |
|-------------|---------------------------------------------|-----------------------------------------------------------------------------------------|-------|
| Plant line  | sgRNA7                                      | sgRNA2                                                                                  | T-DNA |
| 0724-37-06  | CCTCTTGATGTTAAAATTGAAAC<br>wild type<br>n/a | CCTAATTGGGCCCCACAAGCTCAAATC<br>wild type<br>n/a                                         | -     |
| 0724-22a-06 | CCTCTTGATGTTAAAATTGAAAC<br>wild type<br>n/a | CCTAAT---GGGCCCAAGCTCAAATC<br>homozygous<br>frameshift at aa350 and stop codon at aa357 | +     |

| NbUGT72B34  |                                                                                       |                                                                                               |       |
|-------------|---------------------------------------------------------------------------------------|-----------------------------------------------------------------------------------------------|-------|
| Plant line  | sgRNA7                                                                                | sgRNA2                                                                                        | T-DNA |
| 0724-37-06  | CCTCTTGATGTTAAAATTGAAAC<br>wild type<br>n/a                                           | CCTAA---TTGGGCLCCACAAGCTCAAATC<br>bi-allelic<br>frameshift from aa350 and stop codon at aa396 | -     |
| 0724-22a-06 | CCTCTTG-----<br>homozygous<br>812 bp deletion and frameshift introducing a stop codon | -----ATT<br>homozygous                                                                        | +     |

| NbUGT72AY1  |                                                                                       |                                                                                          |       |
|-------------|---------------------------------------------------------------------------------------|------------------------------------------------------------------------------------------|-------|
| Plant line  | sgRNA6                                                                                | sgRNA3                                                                                   | T-DNA |
| 0724-37-06  | CCCAGT---TCTAGTCTTAGGCAACC<br>homozygous<br>frameshift from aa23, stop codon at aa 34 | GAAAAACCACTCTCACCATGAGG<br>homozygous<br>sequence back in frame, but after stop codon    | -     |
| 0724-22a-06 | CCCAGTTCTAGTCTTAGGCAACC<br>homozygous<br>frameshift from aa23, stop codon at aa 34    | GAAAAACCACTCTCACC---ATGAGG<br>homozygous<br>sequence back in frame, but after stop codon | +     |

| NbUGT72AX1  |                                                                                     |       |
|-------------|-------------------------------------------------------------------------------------|-------|
| Plant line  | sgRNA4                                                                              | T-DNA |
| 0724-37-06  | CCC---CATGGGACACATCATCC<br>homozygous<br>frameshift from aa26, stop codon at aa 40  | -     |
| 0724-22a-06 | CCCTGGACATGGGACACATCATCC<br>homozygous<br>frameshift from aa26, stop codon at aa 34 | +     |

**Supplementary Figure 4. Cas9-mediated mutagenesis of five Group E UGTs** (a) Schematic showing construct design (b) locations of sgRNAs (c) sequences of targets and genotypes of T1 plants

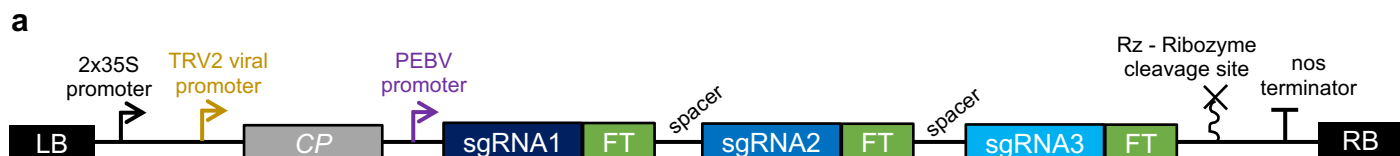

**b**

**pEPQDKN0777**

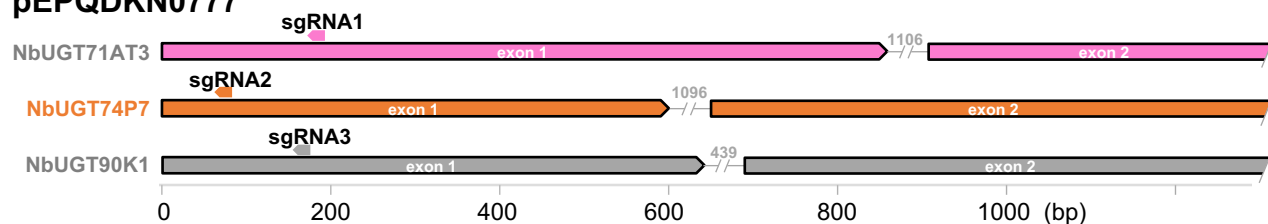

|                 | NbUGT71AT3           | NbUGT74P7                                                          | NbUGT90K1              |
|-----------------|----------------------|--------------------------------------------------------------------|------------------------|
|                 | sgRNA1               | sgRNA2                                                             | sgRNA3                 |
|                 | CCCTTAGACTATGGTGTCAA | CCCCGCACAAGGCCACATAATC                                             | CCTCGCGCCCTTTTGCGCCACC |
| NbCas9-0777B-01 | wild type            | homozygous                                                         | wild type              |
|                 | CCCTTAGACTATGGTGTCAA | CCCCGC-----GCCACATAATC<br>frameshift from aa18, stop codon at aa35 | CCTCGCGCCCTTTTGCGCCACC |
|                 | n/a                  |                                                                    | n/a                    |

**pEPQDKN0778**

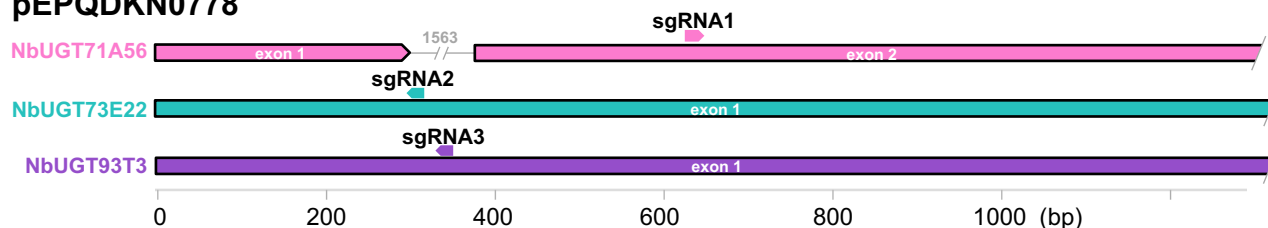

|                 | NbUGT71A56                                                           | NbUGT73E22                                                           | NbUGT93T3                                                           |
|-----------------|----------------------------------------------------------------------|----------------------------------------------------------------------|---------------------------------------------------------------------|
|                 | sgRNA1                                                               | sgRNA2                                                               | sgRNA3                                                              |
|                 | TCACCTTGTACCCACT-GTGGAGG                                             | CCCTA-TGATTGACACTGCGCGAT                                             | CCTCTT-ATGGTCTTCCTGTTAC                                             |
| NbCas9-0778B-05 | homozygous                                                           | homozygous                                                           | homozygous                                                          |
|                 | TCACCTTGTACCCACTGGTGGAGG<br>frameshift from aa21, stop codon at aa54 | CCCTATTGATTGACACTGCGCGAT<br>frameshift from aa24, stop codon at aa26 | CCTCTTAATGGTCTTCCTGTTAC<br>frameshift from aa47, stop codon at aa47 |

**pEPQDKN0779**

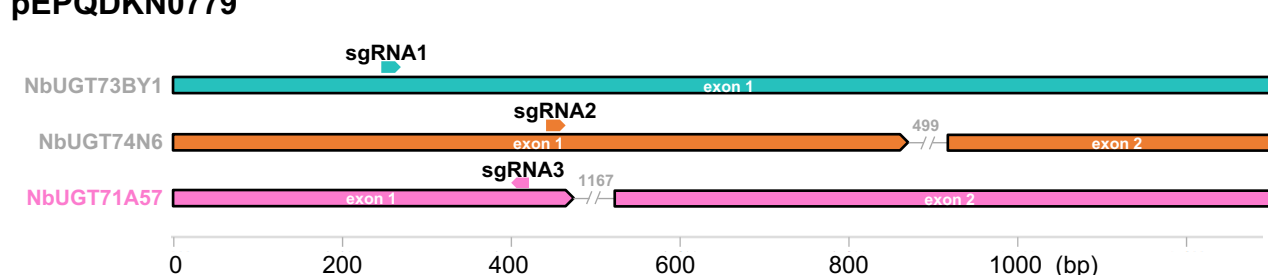

|                 | NbUGT73BY1             | NbUGT74N6               | NbUGT71A57                                                            |
|-----------------|------------------------|-------------------------|-----------------------------------------------------------------------|
|                 | sgRNA1                 | sgRNA2                  | sgRNA3                                                                |
|                 | CCACACCTCTCAATGCCAAAGG | CTACCAAGCGGAAAGCTTCGCGG | CCGCGTTTATGCCGGTCATAAG                                                |
| NbCas9-0779A-01 | wild type              | wild type               | homozygous                                                            |
|                 | CCACACCTCTCAATGCCAAAGG | CTACCAAGCGGAAAGCTTCGCGG | CCGCG- TTATTGCCGGTCATAAG<br>frameshift from aa89, stop codon at aa113 |
|                 | n/a                    | n/a                     |                                                                       |

**Supplementary Figure 5. Cas9-mediated mutagenesis of 16 UGTs using mobile sgRNAs (a)** Schematic showing construct design (b) locations of mobile sgRNAs on target genes and genotypes of target genes in E1 plants

## pEPQDKN0780

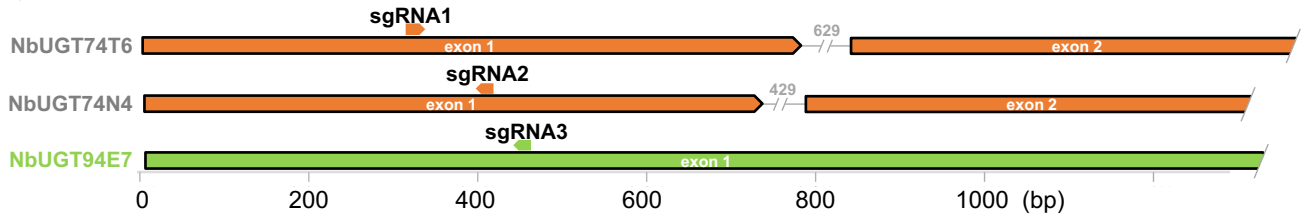

|                        | NbUGT74T6                                         | NbUGT74N4                                          | NbUGT94E7                                                                                     |
|------------------------|---------------------------------------------------|----------------------------------------------------|-----------------------------------------------------------------------------------------------|
|                        | <b>sgRNA1</b>                                     | <b>sgRNA2</b>                                      | <b>sgRNA3</b>                                                                                 |
|                        | GTATCGATACCATTCCGATGGG                            | CCCTGTGAATTGCATAGTTTATG                            | CCCCAT-CTCAATCACGCCCTTAG                                                                      |
| <b>NbCas9-0780B-01</b> | <b>wild type</b><br>GTATCGATACCATTCCGATGGG<br>n/a | <b>wild type</b><br>CCCTGTGAATTGCATAGTTTATG<br>n/a | <b>homozygous</b><br>CCCCATCCTCAATCACGCCCTTAG<br>frameshift from aa95, stop codon at<br>aa100 |

## pEPQDKN0781

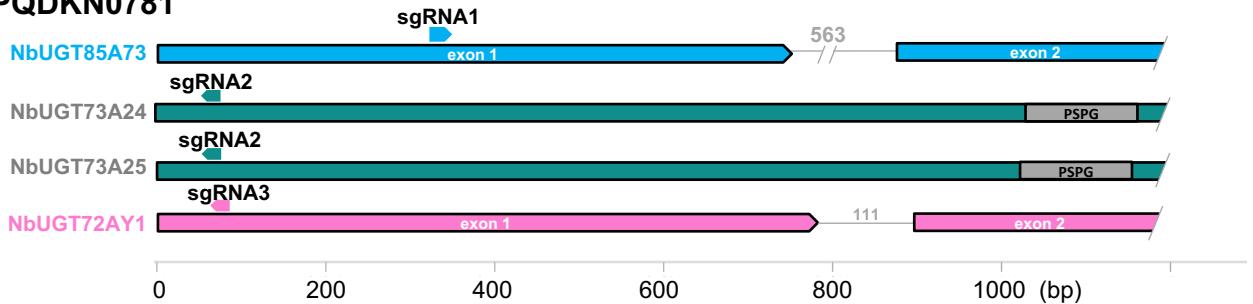

|                        | NbUGT85A73                                                                                                                   | NbUGT73A24 and<br>NbUGT73A25                       | NbUGT72AY1                                                                                  |
|------------------------|------------------------------------------------------------------------------------------------------------------------------|----------------------------------------------------|---------------------------------------------------------------------------------------------|
|                        | <b>sgRNA1</b>                                                                                                                | <b>sgRNA2</b>                                      | <b>sgRNA3</b>                                                                               |
|                        | CGTGGCCCTGATTCTCTCAAGGG                                                                                                      | CCTACACTAGACATGGCGAAGCT                            | CCCAGTTCTAGTCTTAGGCAACC                                                                     |
| <b>NbCas9-0781B-03</b> | <b>bi-allelic</b><br>CGTGGCCCTGATTCTCT-AAGGG<br>CGTGGCCCTGAT-----TCAAGGG<br>frameshift at aa62/63 and stop codon<br>at aa129 | <b>wild type</b><br>CCTACACTAGACATGGCGAAGCT<br>n/a | <b>homozygous</b><br>CCCAG-TCTAGTCTTAGGCAACC<br>frameshift from aa23, stop codon at<br>aa23 |

**Supplementary Figure 5 continued. Cas9-mediated mutagenesis of 16 UGTs using mobile sgRNAs** (a) Schematic showing construct design (b) locations of mobile sgRNAs on target genes and genotypes of target genes in E1 plants

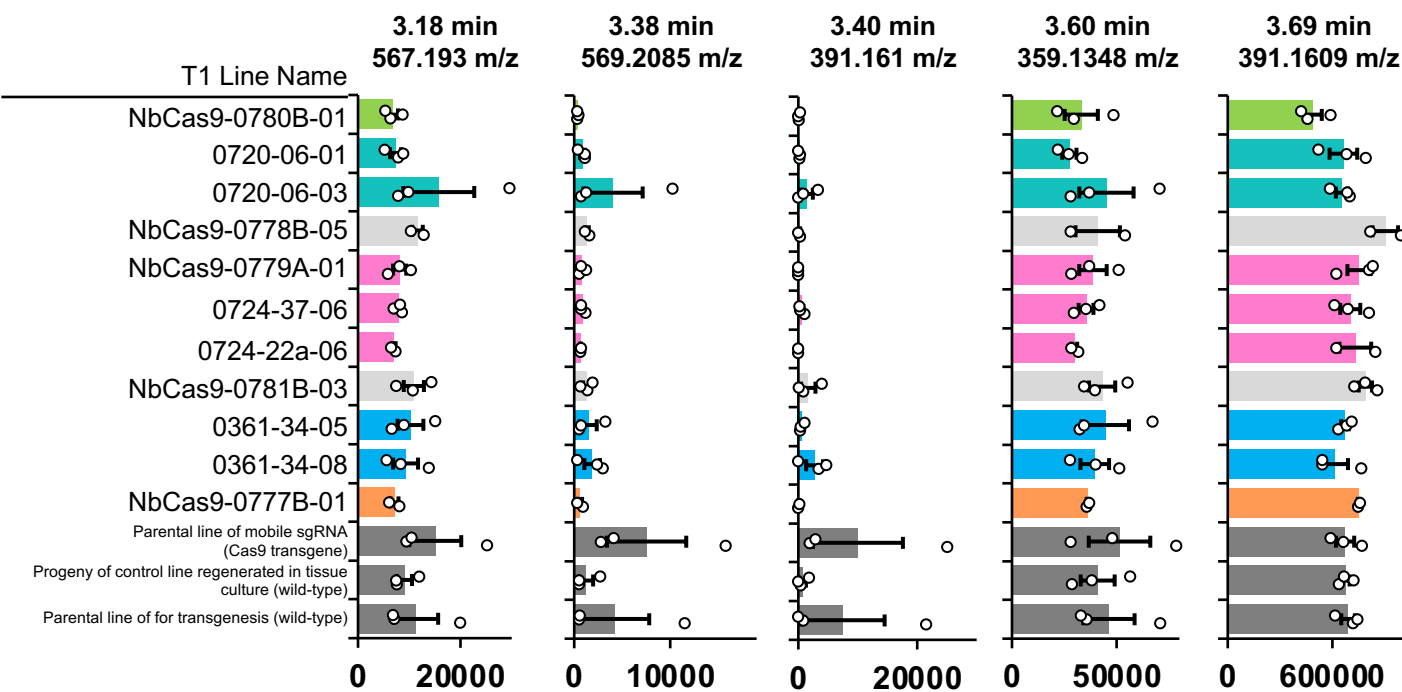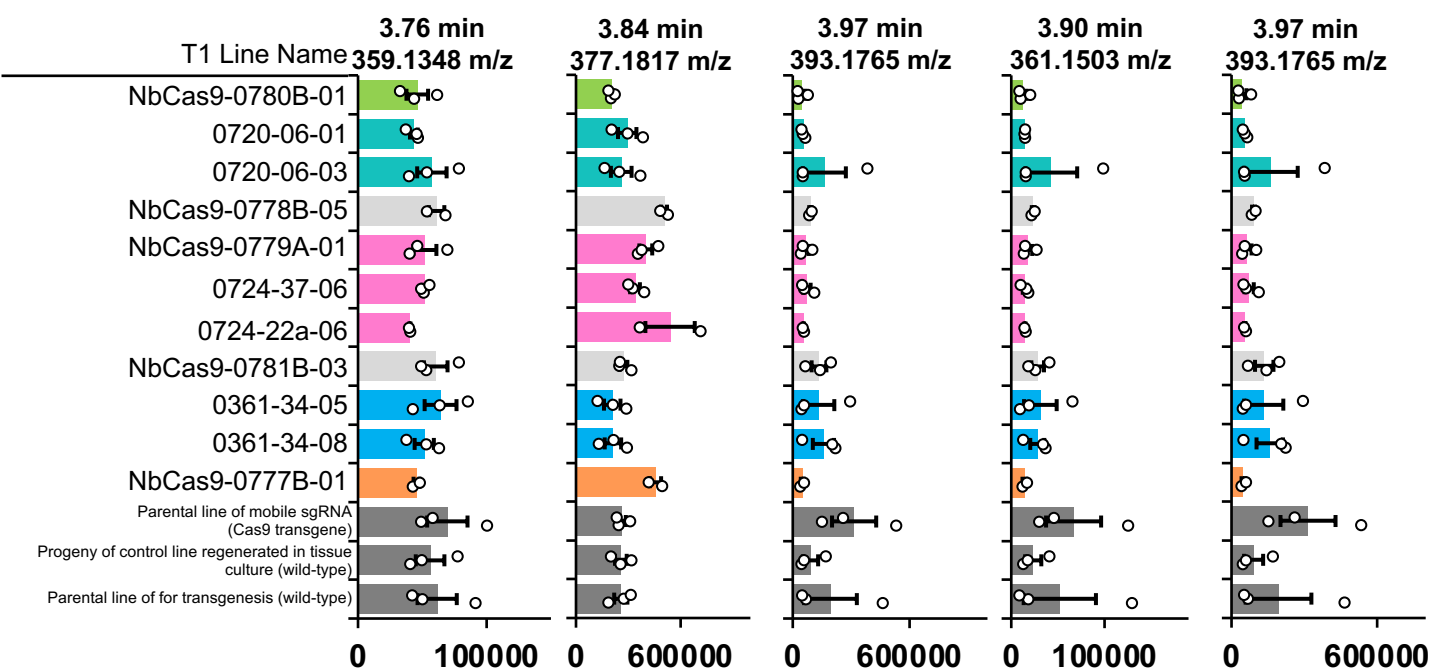

**Supplementary Figure 6. Abundance of derivative peaks in lines of *N. benthamiana* infiltrated with the geraniol biosynthesis pathway (P19 + DXS + GPPS + GES).** Values and error bars represent the mean and the standard error of  $n=3$  biological replicates (independent leaf samples). For the pairwise comparison of all mutated lines to all three control lines (gray bars), means followed by a common Greek letter ( $\alpha, \beta, \gamma, \delta$ ) are not significantly different by a one-way ANOVA with post-hoc Tukey HSD at the 5% level of significance. Plots with no Greek letter values have no experimental lines with significant differences from the three control lines.

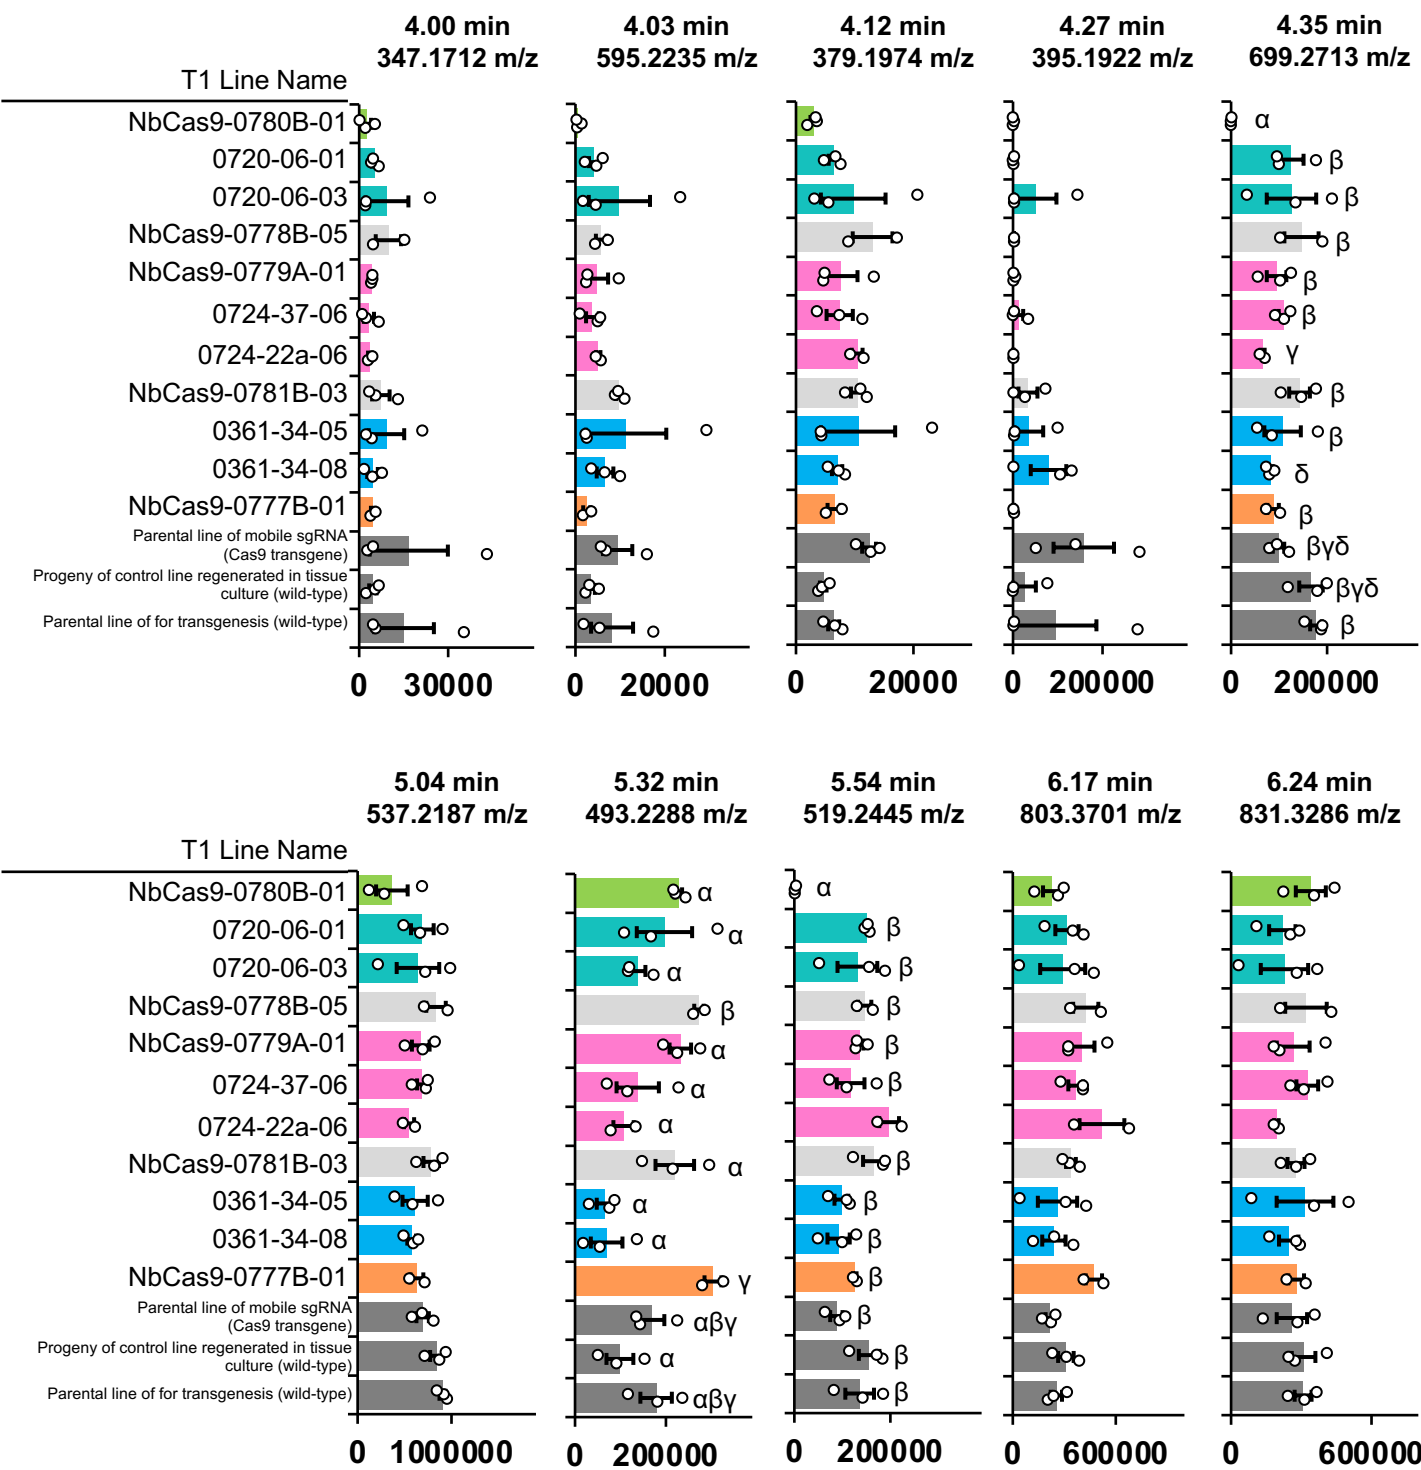

**Supplementary Figure 6 continued. Abundance of derivative peaks in lines of *N. benthamiana* infiltrated with the geraniol biosynthesis pathway (P19 + DXS + GPPS + GES).** Values and error bars represent the mean and the standard error of  $n=3$  biological replicates (independent leaf samples). For the pairwise comparison of all mutated lines to all three control lines (gray bars), means followed by a common Greek letter ( $\alpha, \beta, \gamma, \delta$ ) are not significantly different by a one-way ANOVA with post-hoc Tukey HSD at the 5% level of significance. Plots with no Greek letter values have no experimental lines with significant differences from the three control lines.



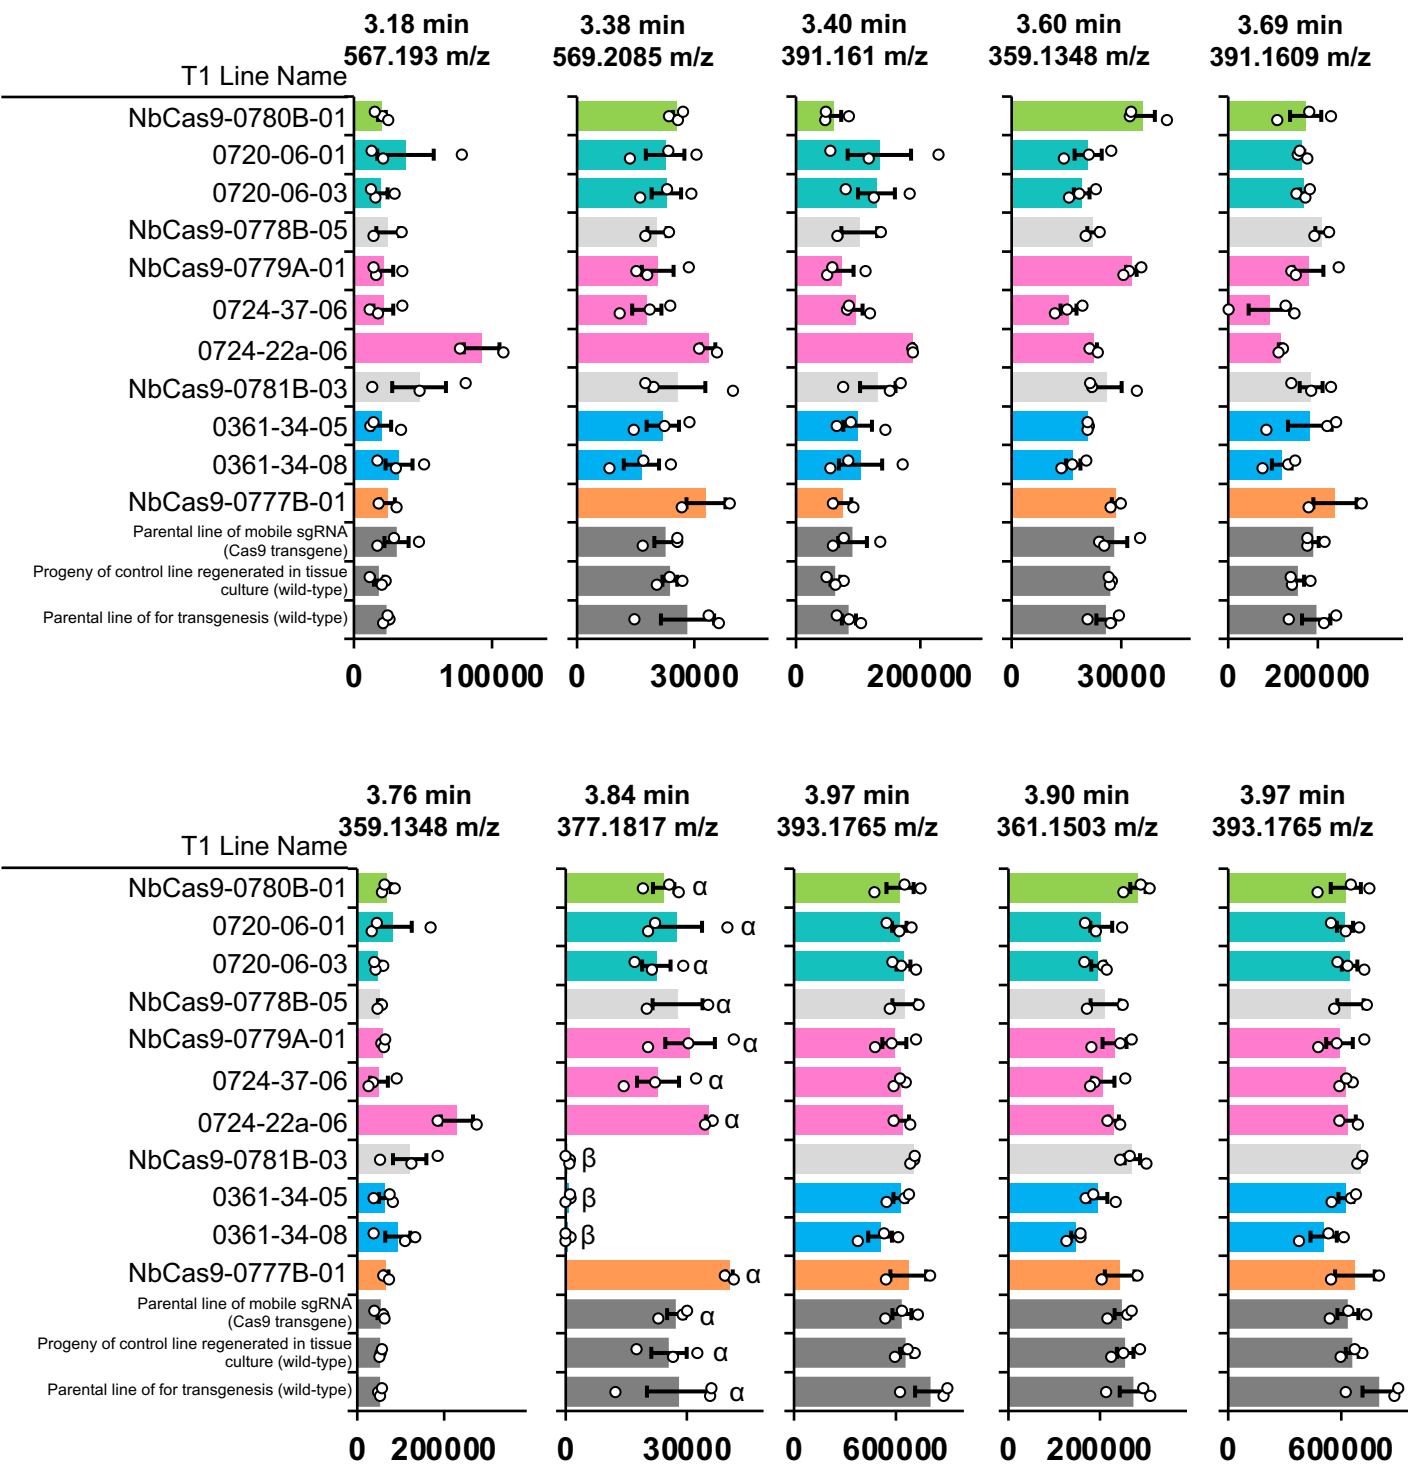

**Supplementary Figure 7. Abundance of derivative peaks in lines of *N. benthamiana* infiltrated with the nepetalactol biosynthesis pathway (P19 + DXS + GPPS + GES + G8H + GOR + ISY + MLPL).** Values and error bars represent the mean and the standard error of n=3 biological replicates (independent leaf samples).

For the pairwise comparison of all mutated lines to all three control lines (gray bars), means followed by a common Greek letter ( $\alpha, \beta, \gamma, \delta$ ) are not significantly different by a one-way ANOVA with post-hoc Tukey HSD at the 5% level of significance. Plots with no Greek letter values have no experimental lines with significant differences from the three control lines.

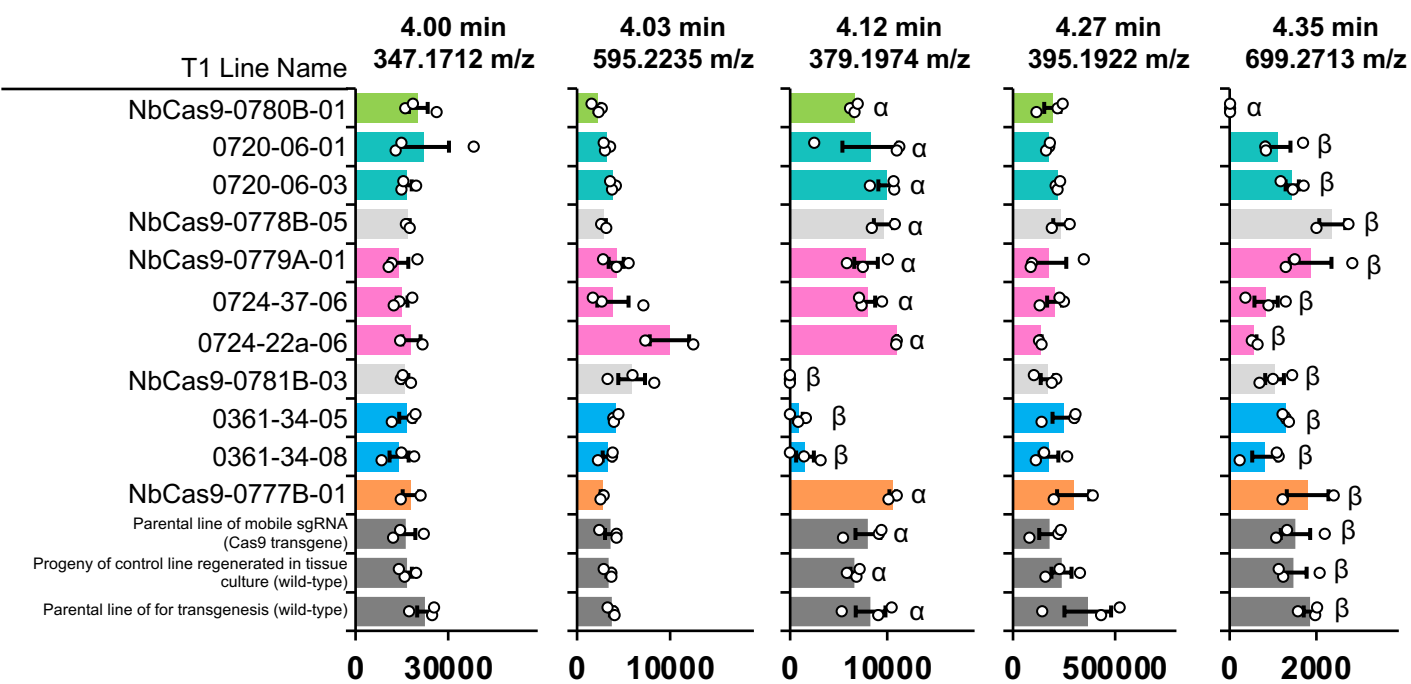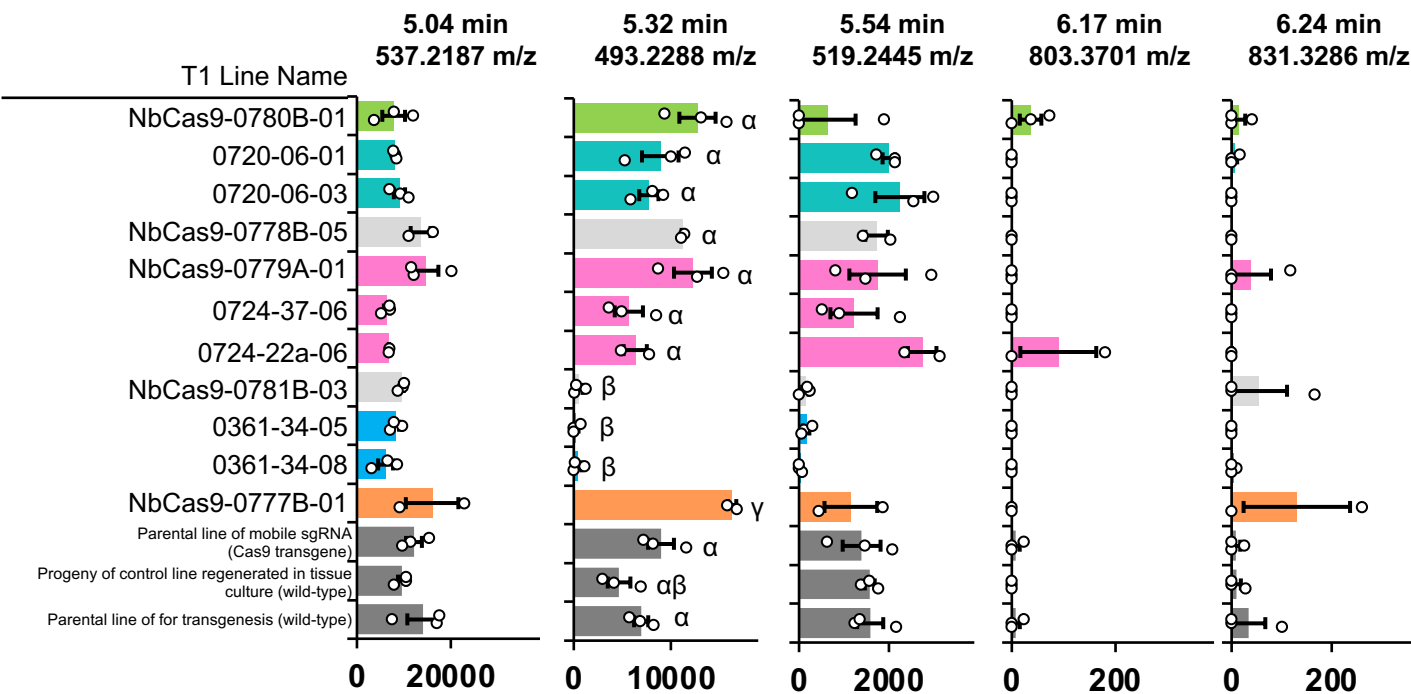

**Supplementary Figure 7 continued. Abundance of derivative peaks in lines of *N. benthamiana* infiltrated with the nepetalactol biosynthesis pathway (P19 + DXS + GPPS + GES + G8H + GOR + ISY + MLPL).** Values and error bars represent the mean and the standard error of  $n=3$  biological replicates (independent leaf samples). For the pairwise comparison of all mutated lines to all three control lines (gray bars), means followed by a common Greek letter ( $\alpha, \beta, \gamma, \delta$ ) are not significantly different by a one-way ANOVA with post-hoc Tukey HSD at the 5% level of significance. Plots with no Greek letter values have no experimental lines with significant differences from the three control lines.

- P19
- DXS
- GPPS
- GES
- G8H
- GOR
- ISY
- MLPL
- IO
- 7-DLGT
- 7-DLH
- LAMT
- SLS
- TDC
- STR
- plastid
- cytosol

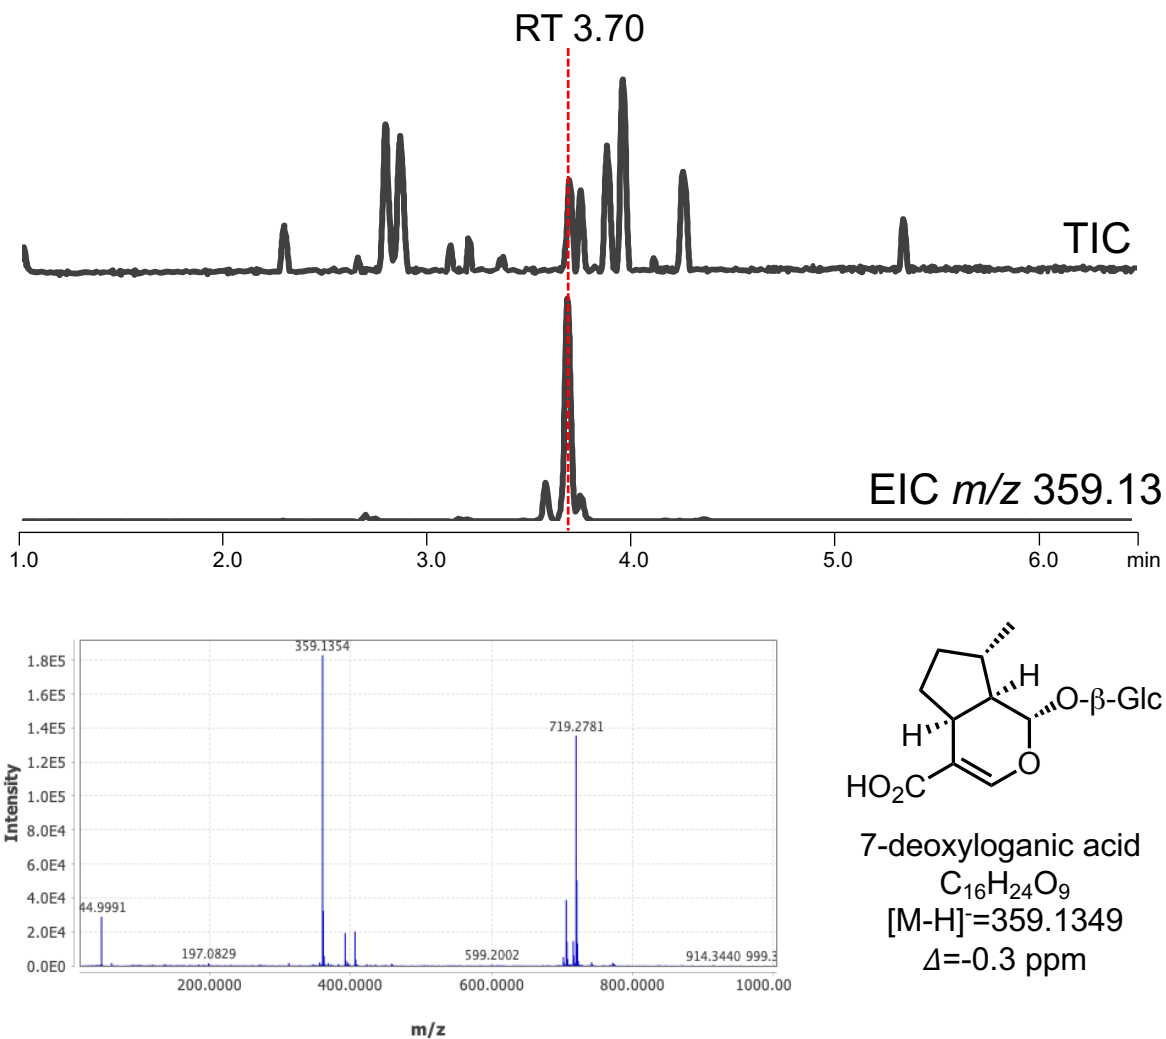

**Supplementary Figure 8.** Detection of 7-deoxyloganic acid following transient expression of pathway genes in *N. benthamiana*

- P19
  - DXS
  - GPPS
  - GES
  - G8H
  - GOR
  - ISY
  - MLPL
  - IO
  - 7-DLGT
  - 7-DLH
  - LAMT
  - SLS
  - TDC
  - STR
- 
- plastid
  - cytosol

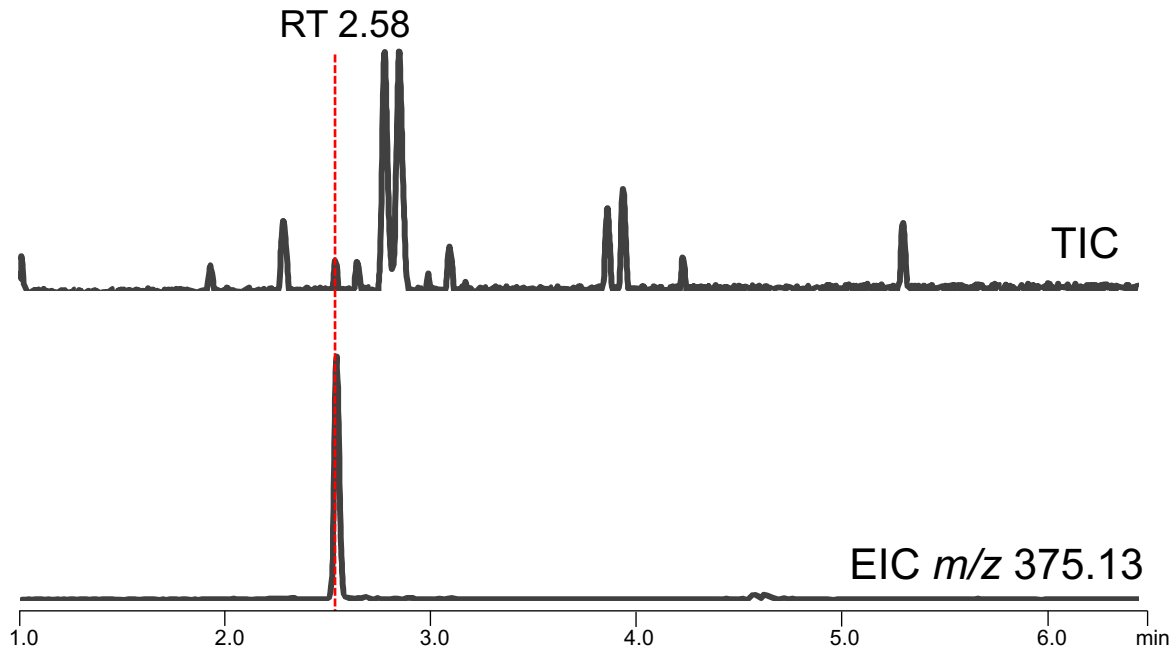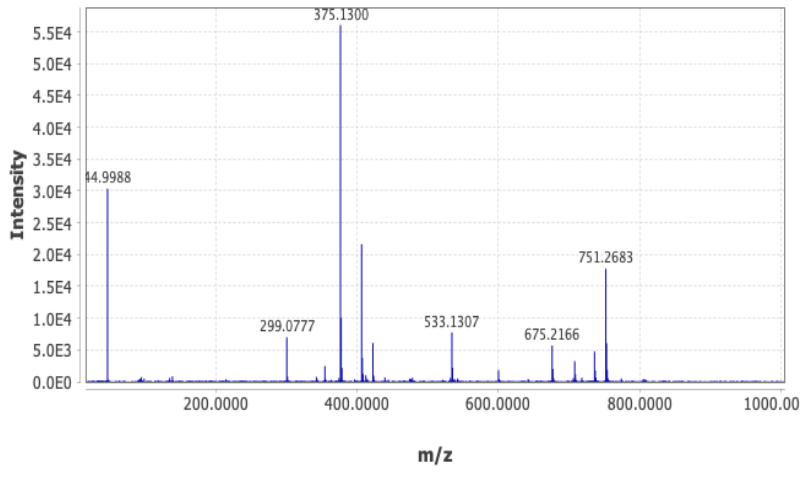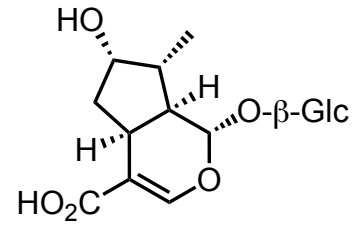

loganic acid  
 $C_{16}H_{24}O_{10}$   
 $[M-H]^- = 375.1296$   
 $\Delta = 0.2$  ppm

**Supplementary Figure 9.** Detection of loganic acid following transient expression of pathway genes in *N. benthamiana*

- P19
  - DXS
  - GPPS
  - GES
  - G8H
  - GOR
  - ISY
  - MLPL
  - IO
  - 7-DLGT
  - 7-DLH
  - LAMT
  - SLS
  - TDC
  - STR
- plastid  
 cytosol

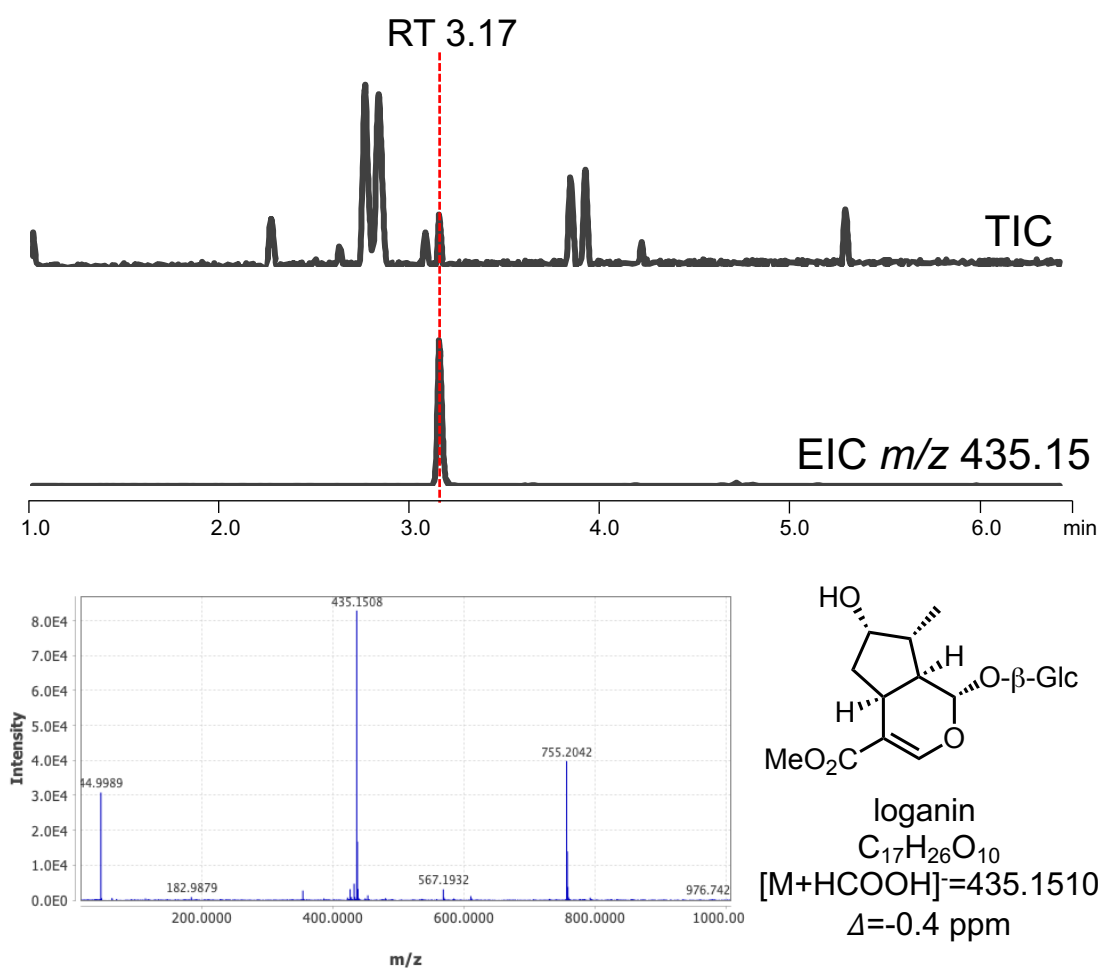

**Supplementary Figure 10.** Detection of loganin following transient expression of pathway genes in *N. benthamiana*

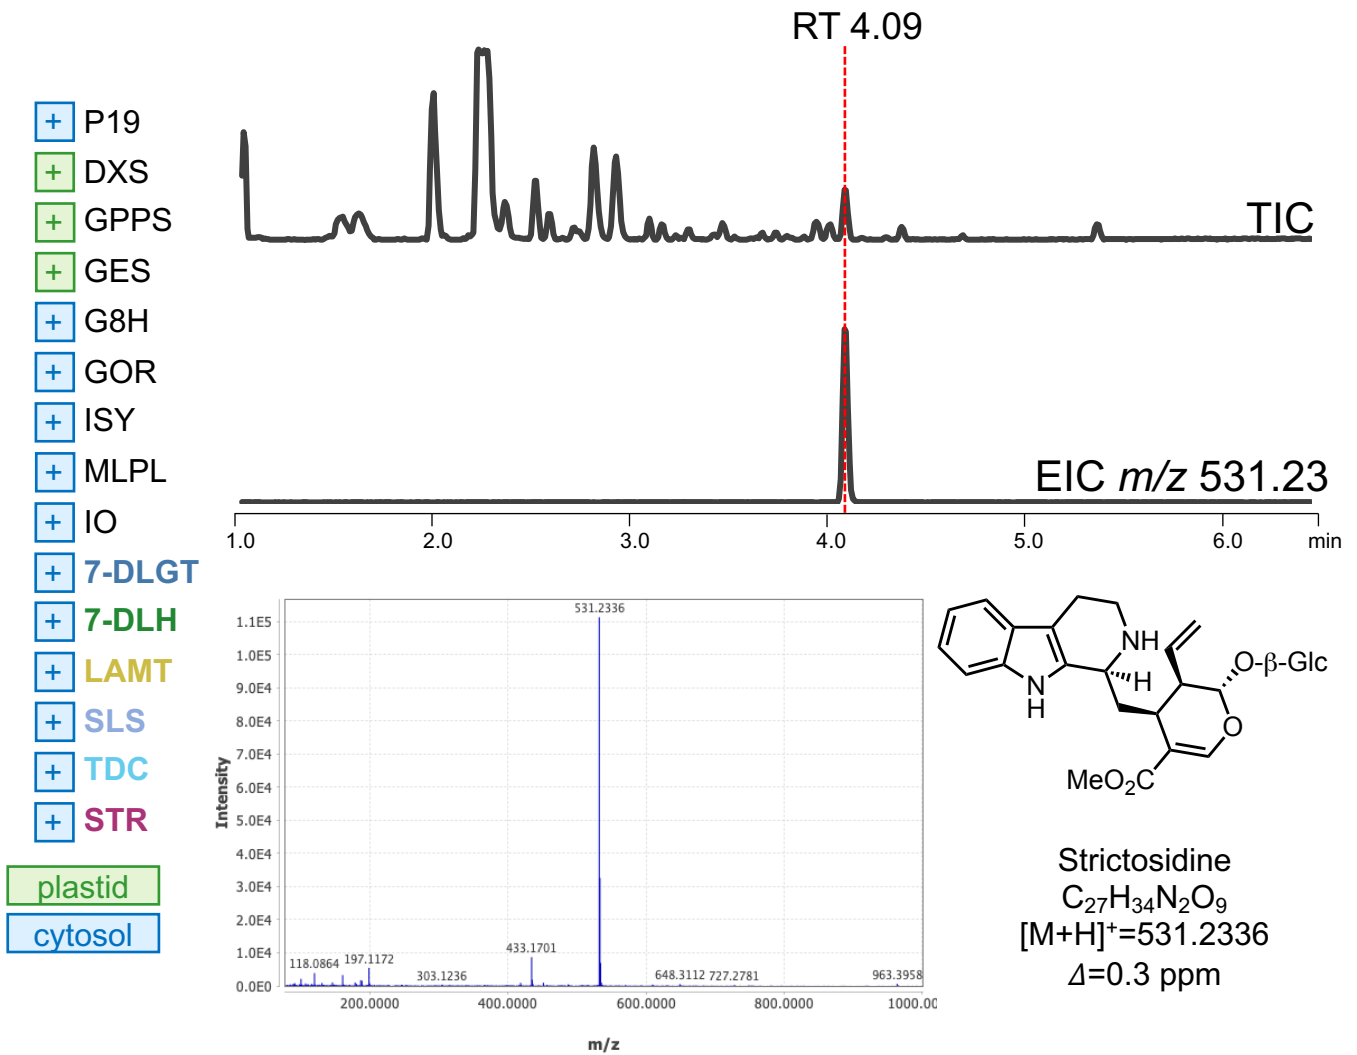

- P19
- DXS
- GPPS
- GES
- G8H
- GOR
- ISY
- MLPL
- IO
- 7-DLGT
- 7-DLH
- LAMT
- SLS
- TDC
- STR
- plastid
- cytosol

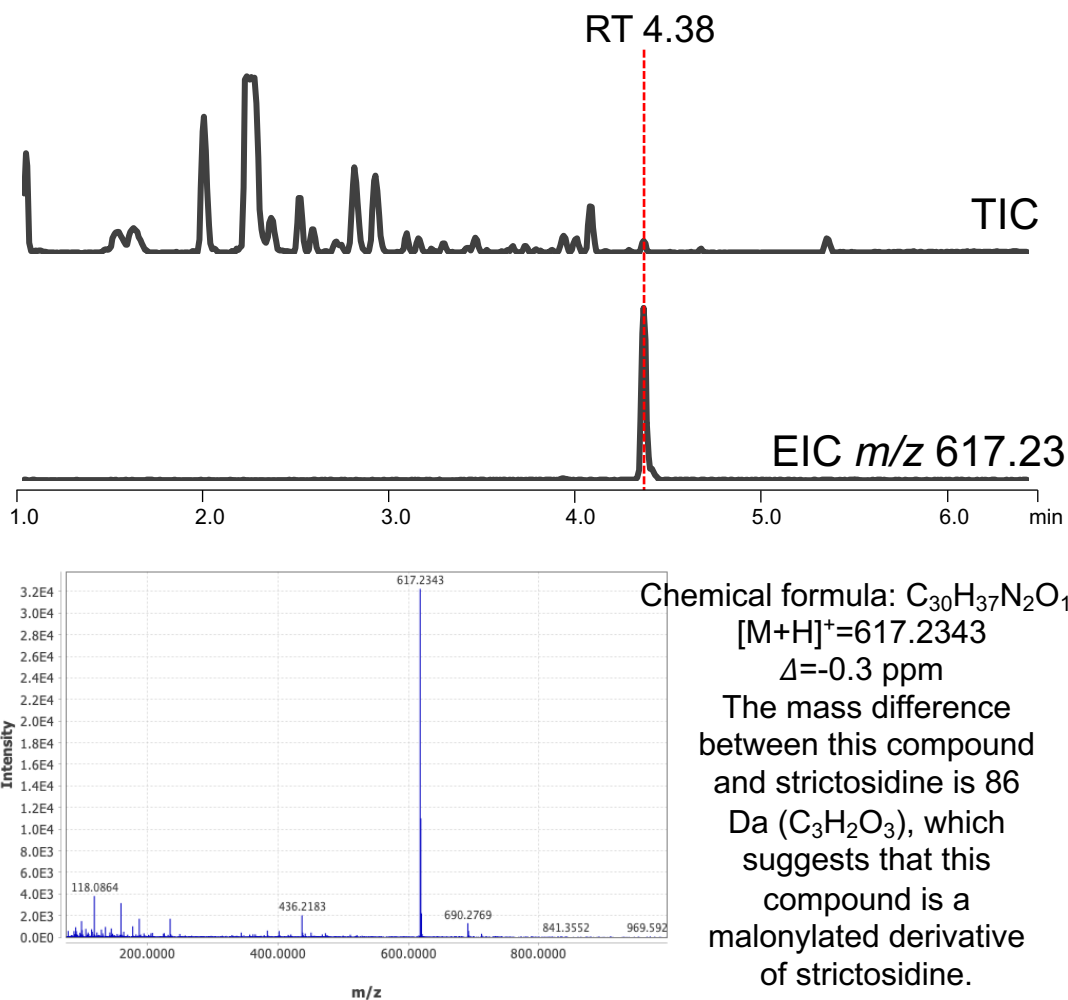

**Supplementary Figure 12.** Detection of putative malonyl-strictosidine following transient expression of pathway genes in *N. benthamiana*

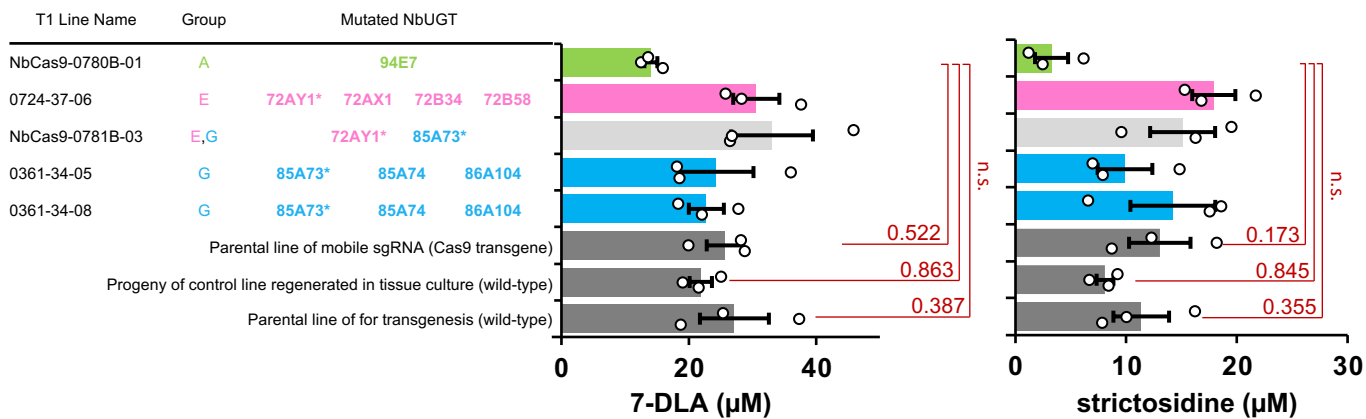

**Supplementary Figure 13. Quantification of strictosidine following transient expression of pathway genes in mutated and wild-type *N. benthamiana* by UPLC/MS analysis.** Values and error bars represent the mean and the standard error of  $n=3$  biological replicates (independent leaf samples). Red numerals indicate exact p-value of a one-way ANOVA with post-hoc Tukey HSD test. n.s. = not significant; p-value > 0.05.



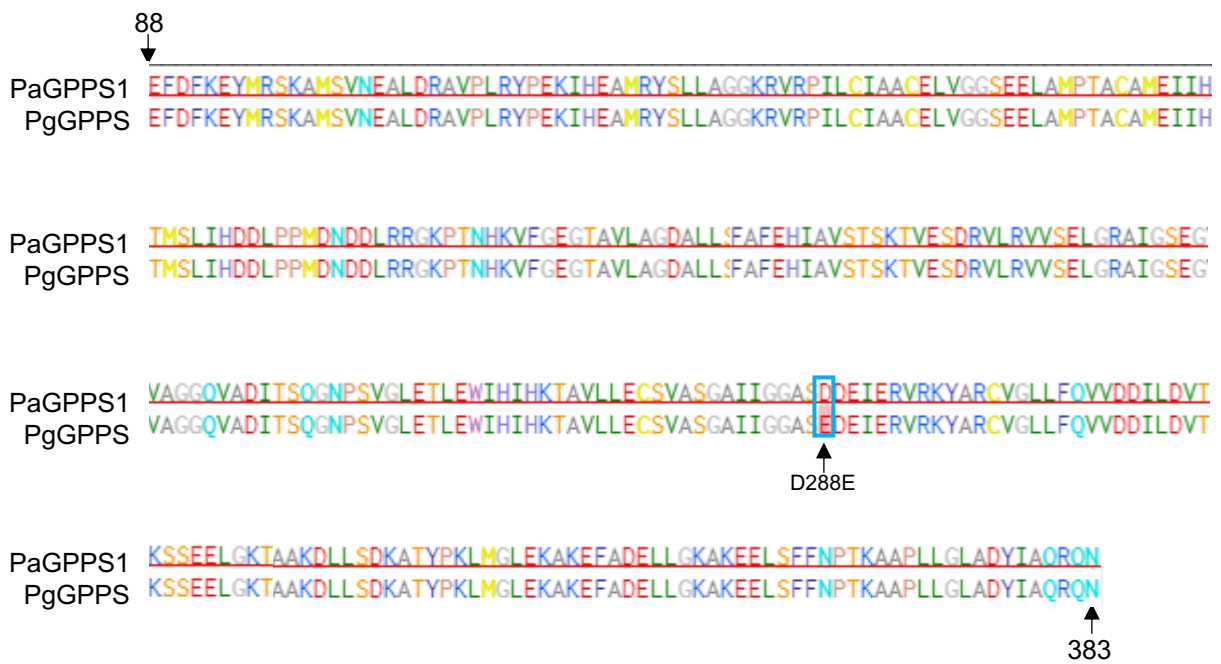

**Supplementary Figure 14. Amino acid sequence alignment of GPPS enzymes.** PaGPPS1 (GQ369788.1) - Used in this study and in Miettinen *et al. Nat. Comm.* 5:3606 (2014) and Dong *et al. New Phytologist* 209:2 679-690 (2016). PgGPPS (AHE15048.1) shown by Dudley *et al. Metab. Eng.* 61 251-260 (2020) to produce higher levels of the monoterpene limonene relative to six other GPPS sequences commonly used in terpene metabolic engineering.

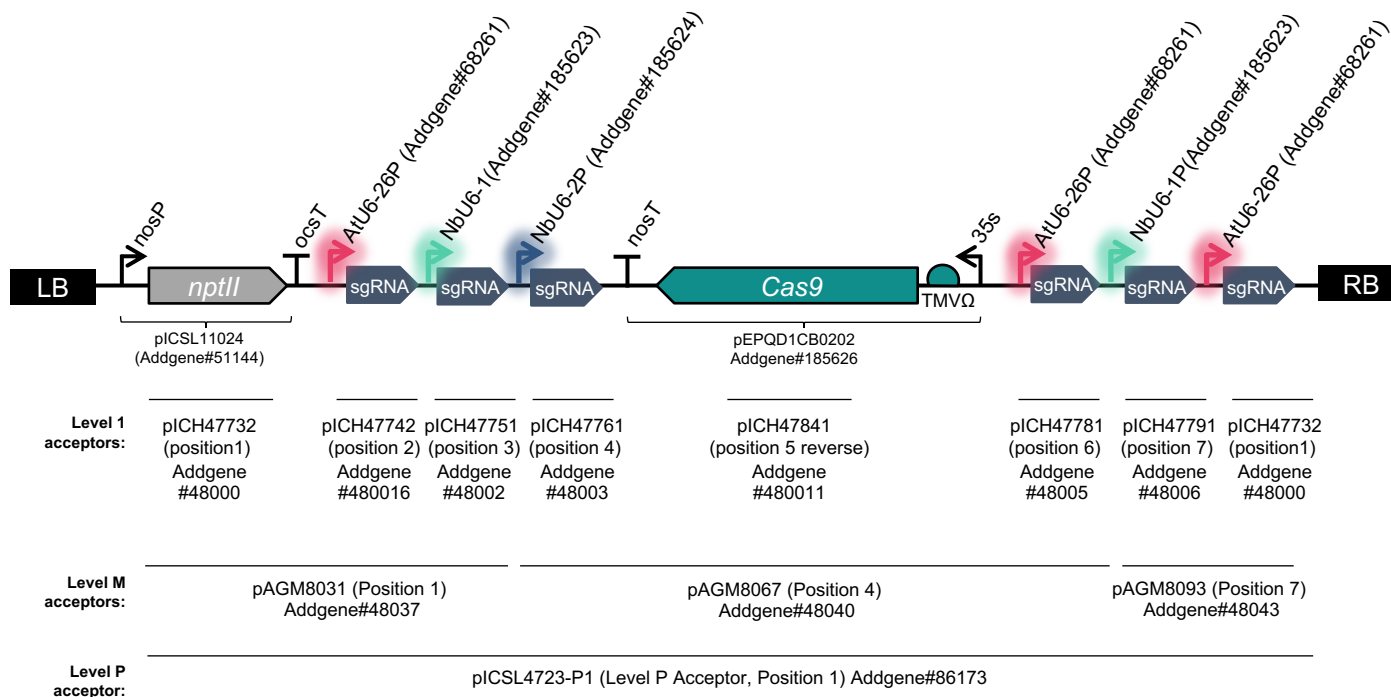

**Supplementary Figure 15.** Design and hierarchical assembly of binary constructs used for Cas9-mediated mutagenesis of *Nicotiana benthamiana*.

**Supplementary Table 1** LC/MS analysis and putative identification of iridoid pathway derivatives produced by pathway expression in *N. benthamiana*.

| Peak number | RT (min) | m/z      | Putative annotation                                                   | Ion Formula | M-H       | M-H <sub>2</sub> O-H | M+HCOOH-H | P19 + GPPS + GES | P19 + DXS + GPPS + GES | P19 + DXS + GPPS + GES + G8H | P19 + DXS + GPPS + GES + G8H + GOR | P19 + DXS + GPPS + GES + G8H + GOR + ISY | P19 + DXS + GPPS + GES + G8H + GOR + ISY + MLPL | m/z      |
|-------------|----------|----------|-----------------------------------------------------------------------|-------------|-----------|----------------------|-----------|------------------|------------------------|------------------------------|------------------------------------|------------------------------------------|-------------------------------------------------|----------|
| -           | 3.18     | 567.1930 | Dihexosyl hydroxycarboxy geranial (+HCOOH-H)                          | C23H35O16   | C23H36O16 | C23H38O17            | C22H34O14 |                  |                        |                              | y                                  |                                          | y                                               | 567.1930 |
| -           | 3.38     | 569.2085 | Dihexosyl hydroxycarboxy geraniol (+HCOOH-H)                          | C23H37O16   | C23H38O16 | C23H40O17            | C22H36O14 |                  |                        |                              | y                                  | y                                        | y                                               | 569.2085 |
| -           | 3.40     | 391.1610 | Hexosyl carboxygeranial (+HCOOH-H)                                    | C17H27O10   | C17H28O10 | C17H30O11            | C16H26O8  |                  |                        |                              |                                    |                                          | y                                               | 391.1610 |
| -           | 3.60     | 359.1348 | Pentosyl dihydroxy geranial (+HCOOH-H) or hexosyl carboxygeranic acid | C16H23O9    | C16H24O9  | C16H26O10            | C15H22O7  | y                | y                      | y                            | y                                  | y                                        |                                                 | 359.1348 |
| -           | 3.69     | 391.1609 | Hexosyl dihydroxy geranial (+HCOOH-H)                                 | C17H27O10   | C17H28O10 | C17H30O11            | C16H26O8  | y                | y                      | y                            | y                                  | y                                        | y                                               | 391.1609 |
| -           | 3.76     | 359.1348 | Pentosyl dihydroxy geranial (+HCOOH-H)                                | C16H23O9    | C16H24O9  | C16H26O10            | C15H22O7  | y                | y                      | y                            | y                                  |                                          |                                                 | 359.1348 |
| 1           | 3.84     | 377.1817 | Hexosyl hydroxygeraniol (+HCOOH-H)                                    | C17H29O9    | C17H30O9  | C17H32O10            | C16H28O7  | y                | y                      | y                            | y                                  |                                          |                                                 | 377.1817 |
| -           | 3.97     | 393.1765 | Hexosyl dihydroxygeraniol (+HCOOH-H)                                  | C17H29O10   | C17H30O10 | C17H32O11            | C16H28O8  | y                | y                      | y                            | y                                  |                                          |                                                 | 393.1765 |
| -           | 3.90     | 361.1503 | Pentosyl hydroxygeranic acid (+HCOOH-H)                               | C16H25O9    | C16H26O9  | C16H28O10            | C15H24O7  | y                | y                      | y                            | y                                  | y                                        | y                                               | 361.1503 |
| -           | 3.97     | 393.1765 | Hexosyl carboxygeraniol (+HCOOH-H)                                    | C17H29O10   | C17H30O10 | C17H32O11            | C16H28O8  |                  | y                      | y                            | y                                  | y                                        | y                                               | 393.1765 |
| -           | 4.00     | 347.1712 | Pentosyl hydroxygeraniol (+HCOOH-H)                                   | C16H27O8    | C16H28O8  | C16H30O9             | C15H26O6  |                  |                        | y                            |                                    |                                          |                                                 | 347.1712 |
| -           | 4.03     | 595.2235 | Malonyl hexosyl pentosyl hydroxygeraniol (+HCOOH-H)                   | C25H39O16   | C25H40O16 | C25H42O17            | C24H38O14 |                  |                        | y                            |                                    |                                          |                                                 | 595.2235 |
| 2           | 4.12     | 379.1974 | Hexosyl hydroxycitronellal (+HCOOH-H)                                 | C17H31O9    | C17H32O9  | C17H34O10            | C16H30O7  |                  |                        | y                            | y                                  |                                          |                                                 | 379.1974 |
| -           | 4.27     | 395.1922 | Hexosyl dihydroxycitronellol (+HCOOH-H)                               | C17H31O10   | C17H32O10 | C17H34O11            | C16H30O8  |                  | y                      | y                            | y                                  | y                                        | y                                               | 395.1922 |
| 3           | 4.35     | 699.2713 | Trihexosyl geranic acid (+HCOOH-H)                                    | C29H47O19   | C29H48O19 | C29H50O20            | C28H46O17 |                  | y                      | y                            | y                                  |                                          |                                                 | 699.2713 |
| -           | 5.04     | 537.2187 | Dihexosyl geranic acid (+HCOOH-H)                                     | C23H37O14   | C23H38O14 | C23H40O15            | C22H36O12 | y                | y                      |                              |                                    |                                          |                                                 | 537.2187 |
| 4           | 5.32     | 493.2288 | Pentosyl hexosyl geraniol (+HCOOH-H)                                  | C22H37O12   | C22H38O12 | C22H40O13            | C21H36O10 | y                | y                      |                              |                                    |                                          |                                                 | 493.2288 |
| 5           | 5.54     | 519.2445 | Acetyl dihexosyl geraniol                                             | C24H39O12   | C24H40O12 | C24H42O13            | C23H38O10 | y                | y                      |                              |                                    |                                          |                                                 | 519.2445 |
| -           | 6.17     | 803.3701 | Malonyl hexosyl geraniol (dimer)                                      | C38H59O18   | C38H60O18 | C38H62O19            | C37H58O16 | y                | y                      |                              |                                    |                                          |                                                 | 803.3701 |
| -           | 6.24     | 831.3286 | Malonyl hexosyl geranic acid (dimer)                                  | C38H55O20   | C38H56O20 | C38H58O21            | C37H54O18 | y                | y                      |                              |                                    |                                          |                                                 | 831.3286 |

**Supplementary Table 2** Expression levels and protein features of *N. benthamiana* UDP-glycosyltransferases (UGTs) Relative activity on geraniol is reported from Sun et al. 2019<sup>1</sup>

| UGT         | Group code | Mutagenesis Plasmid | Status in T0 plants | Geraniol activity (relative) | Length (amino acids) | His | Asp | PSPG | GSS | GFP/ Untransformed |                |                  | Low geraniol /GFP |                |                  | High geraniol /GFP |                |                  | Nepetalactol /GFP |                |                  | DESeq2 Normalized counts |       |              |               |               |
|-------------|------------|---------------------|---------------------|------------------------------|----------------------|-----|-----|------|-----|--------------------|----------------|------------------|-------------------|----------------|------------------|--------------------|----------------|------------------|-------------------|----------------|------------------|--------------------------|-------|--------------|---------------|---------------|
|             |            |                     |                     |                              |                      |     |     |      |     | log2 fold change   | standard error | adjusted p-value | log2 fold change  | standard error | adjusted p-value | log2 fold change   | standard error | adjusted p-value | log2 fold change  | standard error | adjusted p-value | untrans-formed           | GFP   | Low geraniol | High geraniol | Nepeta-lactol |
| NbUGT90K1   | Group C    | pEPQDKN0777         | targeted            |                              | 468                  | Y   | Y   | Y    | Y   | 5.180              | 0.169          | 7.53E-204        | 0.109             | 0.161          | 8.76E-01         | -0.378             | 0.161          | 1.40E-01         | -0.202            | 0.161          | 3.83E-01         | 234                      | 9698  | 8983         | 6890          | 7796          |
| NbUGT71AT3  | Group E    | pEPQDKN0777         | targeted            |                              | 476                  | Y   | Y   | Y    | Y   | 8.660              | 0.228          | 0.00E+00         | 0.084             | 0.182          | 9.30E-01         | 0.100              | 0.182          | 8.48E-01         | 0.792             | 0.182          | 1.11E-03         | 28                       | 15346 | 14462        | 15514         | 25270         |
| NbUGT74P7   | Group L    | pEPQDKN0777         | mutated             |                              | 454                  | Y   | Y   | Y    | Y   | 4.827              | 0.164          | 1.38E-187        | -0.034            | 0.158          | 9.74E-01         | 0.292              | 0.157          | 2.96E-01         | 0.224             | 0.157          | 3.13E-01         | 292                      | 8520  | 8724         | 10707         | 10209         |
| NbUGT73E22  | Group D    | pEPQDKN0778         | mutated             |                              | 488                  | Y   | Y   | Y    | Y   | -1.839             | 0.378          | 2.95E-06         | 0.388             | 0.380          | 7.58E-01         | 1.862              | 0.378          | 5.00E-05         | 2.044             | 0.378          | 4.24E-05         | 602                      | 202   | 151          | 613           | 702           |
| NbUGT71A56  | Group E    | pEPQDKN0778         | mutated             |                              | 399                  | Y   | Y   | Y    | no  | -1.267             | 0.537          | 2.88E-02         | 0.347             | 0.537          | 8.84E-01         | 1.330              | 0.537          | 1.10E-01         | 2.046             | 0.537          | 4.36E-03         | 2331                     | 1069  | 792          | 2458          | 4448          |
| NbUGT93T3   | Group O    | pEPQDKN0778         | mutated             |                              | 473                  | Y   | Y   | Y    | Y   | -1.998             | 0.128          | 8.99E-54         | 0.127             | 0.132          | 7.79E-01         | 1.135              | 0.129          | 6.80E-16         | -0.070            | 0.132          | 7.50E-01         | 1668                     | 451   | 413          | 913           | 393           |
| NbUGT73BY1  | Group D    | pEPQDKN0779         | targeted            |                              | 493                  | Y   | Y   | Y    | Y   | 0.444              | 0.513          | 4.56E-01         | 0.081             | 0.512          | 9.82E-01         | 0.430              | 0.512          | 7.33E-01         | 2.494             | 0.511          | 2.50E-04         | 174                      | 270   | 252          | 360           | 1912          |
| NbUGT71A57  | Group E    | pEPQDKN0779         | mutated             |                              | 484                  | Y   | Y   | Y    | Y   | -0.485             | 0.579          | 4.71E-01         | -0.292            | 0.581          | 9.20E-01         | 0.185              | 0.580          | 9.21E-01         | 3.285             | 0.576          | 1.28E-05         | 59                       | 29    | 38           | 45            | 635           |
| NbUGT74N6   | Group L    | pEPQDKN0779         | targeted            |                              | 458                  | Y   | Y   | Y    | Y   | 2.582              | 0.560          | 1.01E-05         | 0.024             | 0.551          | 9.96E-01         | 1.104              | 0.550          | 2.39E-01         | 2.956             | 0.549          | 4.65E-05         | 11                       | 134   | 131          | 335           | 1527          |
| NbUGT94E7   | Group A    | pEPQDKN0780         | mutated             |                              | 327                  | Y   | Y   | Y    | no  | 4.769              | 0.478          | 1.74E-22         | -0.119            | 0.473          | 9.68E-01         | 0.880              | 0.473          | 2.93E-01         | 2.262             | 0.473          | 3.10E-04         | 38                       | 1902  | 2090         | 4188          | 12300         |
| NbUGT74N4   | Group L    | pEPQDKN0780         | targeted            |                              | 461                  | Y   | Y   | Y    | Y   | 3.328              | 0.434          | 8.83E-14         | -0.146            | 0.433          | 9.53E-01         | 0.691              | 0.433          | 4.03E-01         | 2.085             | 0.433          | 2.90E-04         | 403                      | 4980  | 5578         | 9515          | 27698         |
| NbUGT74T6   | Group L    | pEPQDKN0780         | targeted            |                              | 457                  | Y   | Y   | Y    | Y   | 1.421              | 0.226          | 1.29E-09         | -0.299            | 0.226          | 6.34E-01         | -0.113             | 0.226          | 8.64E-01         | 0.986             | 0.226          | 1.06E-03         | 8910                     | 19815 | 24513        | 22619         | 49467         |
| NbUGT85A73* | Group G    | pEPQDPKN0361        | mutated             | 100                          | 486                  | Y   | Y   | Y    | Y   | -1.293             | 0.166          | 2.87E-14         | 0.012             | 0.166          | 9.93E-01         | 0.149              | 0.166          | 7.08E-01         | 0.605             | 0.166          | 6.28E-03         | 7224                     | 2934  | 2910         | 3231          | 4453          |
| NbUGT85A104 | Group G    | pEPQDPKN0361        | mutated             |                              | 496                  | Y   | Y   | Y    | Y   | -3.836             | 0.301          | 5.56E-36         | 1.865             | 0.310          | 4.19E-07         | 0.271              | 0.333          | 7.44E-01         | 0.661             | 0.322          | 1.23E-01         | 341                      | 83    | 21           | 26            | 35            |
| NbUGT85A74  | Group G    | pEPQDPKN0361        | mutated             |                              | 462                  | Y   | Y   | Y    | no  | -1.946             | 0.168          | 5.54E-30         | 0.398             | 0.170          | 2.06E-01         | 0.747              | 0.170          | 4.35E-04         | 0.616             | 0.170          | 6.64E-03         | 1525                     | 514   | 388          | 657           | 599           |
| NbUGT73A24* | Group D    | pEPQDPKN0720        | mutated             | 81                           | 477                  | Y   | Y   | Y    | Y   | 0.671              | 0.267          | 1.92E-02         | 0.053             | 0.267          | 9.76E-01         | 1.120              | 0.266          | 9.27E-04         | 1.217             | 0.266          | 5.84E-04         | 3752                     | 6326  | 6087         | 13633         | 14616         |
| NbUGT73A25* | Group D    | pEPQDPKN0720        | mutated             | 47                           | 477                  | Y   | Y   | Y    | Y   | 2.688              | 0.344          | 2.79E-14         | 0.114             | 0.341          | 9.54E-01         | 1.114              | 0.341          | 1.85E-02         | 1.614             | 0.341          | 3.65E-04         | 239                      | 1929  | 1773         | 4038          | 5836          |
| NbUGT73A32  | Group D    | pEPQDPKN0720        | mutated             |                              | 412                  | Y   | Y   | Y    | no  | 1.309              | 0.131          | 1.58E-22         | -0.167            | 0.125          | 6.30E-01         | 0.117              | 0.125          | 6.91E-01         | -0.181            | 0.125          | 3.03E-01         | 271                      | 602   | 677          | 735           | 596           |
| NbUGT73Q2   | Group D    | pEPQDPKN0720        | mutated             |                              | 486                  | Y   | no  | Y    | Y   | 5.389              | 0.356          | 1.47E-50         | 0.037             | 0.345          | 9.90E-01         | 0.138              | 0.345          | 8.99E-01         | 1.671             | 0.345          | 2.77E-04         | 55                       | 3321  | 3231         | 3578          | 11082         |
| NbUGT72AX1  | Group E    | pEPQDPKN0724        | mutated             | 2                            | 489                  | Y   | Y   | Y    | Y   | -0.502             | 0.233          | 4.73E-02         | -0.177            | 0.233          | 8.51E-01         | -0.427             | 0.233          | 3.05E-01         | -0.740            | 0.233          | 1.69E-02         | 11298                    | 6959  | 7898         | 5824          | 4658          |
| NbUGT72AY1* | Group E    | pEPQDPKN0724        | mutated             | 23                           | 478                  | Y   | Y   | Y    | Y   | -0.549             | 0.366          | 1.78E-01         | -0.647            | 0.370          | 4.46E-01         | -0.379             | 0.369          | 6.55E-01         | -0.768            | 0.370          | 1.18E-01         | 226                      | 92    | 150          | 113           | 84            |
| NbUGT72B34  | Group E    | pEPQDPKN0724        | mutated             | 11                           | 479                  | Y   | Y   | Y    | Y   | 1.979              | 0.125          | 5.89E-55         | -0.097            | 0.123          | 8.43E-01         | -0.070             | 0.123          | 8.38E-01         | 0.356             | 0.123          | 2.77E-02         | 1028                     | 3831  | 4099         | 3902          | 5258          |

|             |         |                      |   |     |    |    |   |    |        |       |           |        |       |          |        |       |          |        |       |          |      |      |      |      |      |
|-------------|---------|----------------------|---|-----|----|----|---|----|--------|-------|-----------|--------|-------|----------|--------|-------|----------|--------|-------|----------|------|------|------|------|------|
| NbUGT72B35  | Group E | pEPQDPKN0724 mutated | 1 | 479 | Y  | Y  | Y | Y  | -0.120 | 0.118 | 3.73E-01  | 0.042  | 0.118 | 9.50E-01 | 0.575  | 0.117 | 5.76E-05 | 0.334  | 0.117 | 3.08E-02 | 4025 | 3811 | 3701 | 5530 | 4673 |
| NbUGT72B58  | Group E | pEPQDPKN0724 mutated |   | 479 | Y  | Y  | Y | Y  | -1.049 | 0.123 | 9.74E-17  | -0.084 | 0.126 | 8.80E-01 | 0.244  | 0.125 | 2.60E-01 | -0.311 | 0.126 | 6.02E-02 | 1158 | 525  | 557  | 660  | 448  |
| NbUGT79A16  | Group A | not targeted         |   | 472 | Y  | Y  | Y | no | 0.579  | 0.245 | 2.88E-02  | -0.122 | 0.243 | 9.20E-01 | -0.135 | 0.243 | 8.44E-01 | -0.360 | 0.244 | 2.91E-01 | 201  | 279  | 305  | 277  | 235  |
| NbUGT91A20  | Group A | not targeted         |   | 490 | Y  | Y  | Y | no | -1.337 | 0.250 | 2.71E-07  | -0.450 | 0.256 | 4.41E-01 | -0.968 | 0.260 | 4.83E-03 | -0.848 | 0.258 | 1.36E-02 | 527  | 146  | 202  | 101  | 110  |
| NbUGT91R10  | Group A | not targeted         |   | 467 | Y  | Y  | Y | no | -1.955 | 0.259 | 2.19E-13  | 0.894  | 0.262 | 2.05E-02 | 0.939  | 0.263 | 7.58E-03 | -0.576 | 0.273 | 1.11E-01 | 362  | 169  | 89   | 175  | 58   |
| NbUGT91S4   | Group A | not targeted         |   | 473 | Y  | Y  | Y | no | 3.781  | 0.175 | 1.87E-101 | -0.544 | 0.137 | 3.99E-03 | -0.643 | 0.138 | 1.55E-04 | 0.416  | 0.135 | 1.97E-02 | 50   | 494  | 722  | 461  | 967  |
| NbUGT94AQ1  | Group A | not targeted         |   | 455 | Y  | Y  | Y | no | 0.678  | 0.433 | 1.58E-01  | -0.039 | 0.433 | 9.91E-01 | 0.992  | 0.432 | 1.52E-01 | 2.085  | 0.432 | 2.85E-04 | 710  | 1171 | 1207 | 2605 | 6034 |
| NbUGT94AR1  | Group A | not targeted         |   | 467 | Y  | Y  | Y | Y  | 1.469  | 0.189 | 4.35E-14  | 0.082  | 0.177 | 9.29E-01 | -0.267 | 0.179 | 4.49E-01 | -0.273 | 0.178 | 2.71E-01 | 101  | 304  | 287  | 238  | 236  |
| NbUGT94U2   | Group A | not targeted         |   | 444 | Y  | Y  | Y | no | -0.721 | 0.629 | 3.13E-01  | 0.140  | 0.631 | 9.72E-01 | 0.636  | 0.630 | 6.63E-01 | 3.505  | 0.626 | 2.01E-05 | 36   | 20   | 17   | 34   | 444  |
| NbUGT89D20  | Group B | not targeted         |   | 468 | Y  | Y  | Y | Y  | -0.994 | 0.252 | 1.68E-04  | -0.004 | 0.253 | 9.98E-01 | 0.390  | 0.252 | 4.26E-01 | 0.995  | 0.251 | 3.08E-03 | 949  | 464  | 465  | 615  | 950  |
| NbUGT89V1   | Group B | not targeted         |   | 482 | Y  | Y  | Y | Y  | 2.554  | 0.101 | 3.43E-138 | -0.229 | 0.091 | 1.52E-01 | -0.030 | 0.091 | 9.19E-01 | 0.010  | 0.090 | 9.54E-01 | 284  | 1440 | 1689 | 1654 | 1701 |
| NbUGT90A22  | Group C | not targeted         |   | 465 | Y  | Y  | Y | Y  | -1.188 | 0.181 | 2.10E-10  | -0.016 | 0.182 | 9.91E-01 | 0.045  | 0.182 | 9.43E-01 | -0.524 | 0.182 | 2.92E-02 | 2952 | 1263 | 1277 | 1318 | 882  |
| NbUGT73AB10 | Group D | not targeted         |   | 492 | Y  | Y  | Y | Y  | 6.594  | 0.302 | 8.71E-104 | 0.175  | 0.182 | 7.79E-01 | -0.184 | 0.182 | 6.63E-01 | -0.181 | 0.182 | 5.07E-01 | 7    | 1154 | 1020 | 896  | 897  |
| NbUGT73BZ1  | Group D | not targeted         |   | 493 | Y  | Y  | Y | Y  | 0.292  | 0.186 | 1.58E-01  | 0.191  | 0.186 | 7.56E-01 | 0.174  | 0.186 | 6.93E-01 | 0.047  | 0.186 | 8.88E-01 | 1227 | 1724 | 1507 | 1703 | 1558 |
| NbUGT73E20  | Group D | not targeted         |   | 497 | Y  | Y  | Y | Y  | 0.070  | 0.254 | 8.24E-01  | -0.179 | 0.254 | 8.68E-01 | 0.175  | 0.253 | 7.93E-01 | 1.117  | 0.252 | 8.58E-04 | 524  | 485  | 552  | 625  | 1229 |
| NbUGT73E21  | Group D | not targeted         |   | 496 | Y  | Y  | Y | Y  | 0.753  | 0.294 | 1.70E-02  | -0.013 | 0.294 | 9.96E-01 | 0.759  | 0.294 | 8.97E-02 | 1.549  | 0.294 | 6.74E-05 | 1534 | 2629 | 2654 | 4606 | 8168 |
| NbUGT73E23  | Group D | not targeted         |   | 495 | Y  | no | Y | Y  | 0.492  | 0.098 | 1.33E-06  | 0.103  | 0.094 | 7.29E-01 | -0.048 | 0.095 | 8.62E-01 | 0.128  | 0.093 | 3.33E-01 | 368  | 556  | 517  | 500  | 566  |
| NbUGT71AJ1  | Group E | not targeted         |   | 476 | Y  | Y  | Y | Y  | 1.318  | 0.082 | 3.72E-57  | -0.513 | 0.080 | 5.82E-08 | -0.411 | 0.080 | 2.16E-05 | -0.106 | 0.080 | 3.52E-01 | 1675 | 2934 | 4190 | 3147 | 3890 |
| NbUGT71AT2  | Group E | not targeted         |   | 483 | Y  | Y  | Y | Y  | -0.247 | 0.044 | 8.20E-08  | -0.078 | 0.045 | 4.47E-01 | 0.049  | 0.045 | 6.25E-01 | -0.061 | 0.045 | 3.32E-01 | 6339 | 5059 | 5341 | 5525 | 5118 |
| NbUGT71AT4  | Group E | not targeted         |   | 481 | Y  | Y  | Y | Y  | -0.310 | 0.556 | 6.41E-01  | -0.034 | 0.556 | 9.94E-01 | 0.199  | 0.556 | 9.11E-01 | -0.144 | 0.556 | 8.84E-01 | 6978 | 5193 | 5346 | 6342 | 4718 |
| NbUGT71AT5  | Group E | not targeted         |   | 380 | no | Y  | Y | Y  | -1.179 | 0.118 | 1.09E-22  | -0.118 | 0.124 | 7.83E-01 | 0.272  | 0.122 | 1.69E-01 | 0.003  | 0.122 | 9.89E-01 | 643  | 260  | 282  | 341  | 283  |
| NbUGT71AU1  | Group E | not targeted         |   | 493 | Y  | Y  | Y | Y  | 0.482  | 0.111 | 3.45E-05  | 0.036  | 0.109 | 9.54E-01 | 0.077  | 0.109 | 7.87E-01 | -0.045 | 0.109 | 8.07E-01 | 543  | 779  | 759  | 801  | 735  |
| NbUGT71AV1  | Group E | not targeted         |   | 483 | Y  | Y  | Y | Y  | -0.438 | 0.157 | 8.97E-03  | -0.217 | 0.159 | 6.15E-01 | 0.145  | 0.158 | 7.01E-01 | -0.028 | 0.158 | 9.24E-01 | 459  | 290  | 338  | 374  | 332  |
| NbUGT71X3   | Group E | not targeted         |   | 359 | no | no | Y | Y  | 1.759  | 0.104 | 2.94E-62  | -0.017 | 0.099 | 9.79E-01 | -0.243 | 0.100 | 1.18E-01 | 0.291  | 0.099 | 2.53E-02 | 475  | 1603 | 1622 | 1369 | 1988 |
| NbUGT71X4   | Group E | not targeted         |   | 482 | no | Y  | Y | Y  | 0.891  | 0.079 | 3.03E-28  | -0.045 | 0.077 | 8.99E-01 | -0.167 | 0.077 | 1.88E-01 | 0.062  | 0.076 | 6.04E-01 | 831  | 1495 | 1544 | 1374 | 1612 |
| NbUGT78C2   | Group F | not targeted         |   | 444 | Y  | Y  | Y | Y  | -1.542 | 0.258 | 7.60E-09  | 0.414  | 0.264 | 5.24E-01 | 0.858  | 0.262 | 1.77E-02 | 0.095  | 0.266 | 8.37E-01 | 206  | 92   | 68   | 126  | 72   |
| NbUGT76A4   | Group H | not targeted         |   | 482 | Y  | Y  | Y | Y  | 0.587  | 0.070 | 3.03E-16  | 0.000  | 0.069 | 1.00E+00 | 0.121  | 0.069 | 3.33E-01 | -0.045 | 0.069 | 6.85E-01 | 1429 | 2151 | 2150 | 2339 | 2083 |
| NbUGT76A5   | Group H | not targeted         |   | 482 | Y  | Y  | Y | Y  | 0.442  | 0.155 | 7.50E-03  | 0.221  | 0.148 | 5.58E-01 | 0.183  | 0.149 | 5.64E-01 | 0.277  | 0.147 | 1.60E-01 | 130  | 207  | 177  | 202  | 216  |
| NbUGT87AB1  | Group J | not targeted         |   | 458 | Y  | Y  | Y | Y  | -2.245 | 0.122 | 2.28E-74  | 0.425  | 0.124 | 1.99E-02 | 0.617  | 0.124 | 4.18E-05 | -0.177 | 0.126 | 3.21E-01 | 2564 | 720  | 535  | 823  | 472  |

|            |           |              |  |     |    |    |   |    |        |       |          |        |       |          |        |       |          |        |       |          |      |      |      |      |      |
|------------|-----------|--------------|--|-----|----|----|---|----|--------|-------|----------|--------|-------|----------|--------|-------|----------|--------|-------|----------|------|------|------|------|------|
| NbUGT86A25 | Group K   | not targeted |  | 488 | Y  | Y  | Y | Y  | 3.129  | 0.284 | 2.86E-27 | -0.425 | 0.256 | 4.83E-01 | -0.391 | 0.256 | 4.33E-01 | 0.699  | 0.253 | 3.55E-02 | 32   | 231  | 313  | 236  | 516  |
| NbUGT86A26 | Group K   | not targeted |  | 499 | Y  | Y  | Y | Y  | -0.095 | 0.188 | 6.73E-01 | -0.100 | 0.188 | 9.14E-01 | -0.451 | 0.189 | 1.30E-01 | -0.339 | 0.188 | 1.83E-01 | 603  | 525  | 564  | 410  | 443  |
| NbUGT86A27 | Group K   | not targeted |  | 498 | Y  | Y  | Y | Y  | -0.157 | 0.175 | 4.38E-01 | -0.017 | 0.175 | 9.91E-01 | -0.262 | 0.177 | 4.53E-01 | -0.353 | 0.176 | 1.32E-01 | 355  | 314  | 318  | 264  | 247  |
| NbUGT74B13 | Group L   | not targeted |  | 464 | Y  | Y  | Y | Y  | 5.702  | 0.375 | 6.49E-51 | -2.539 | 0.329 | 6.68E-12 | -1.838 | 0.327 | 1.75E-06 | 0.848  | 0.323 | 4.52E-02 | 10   | 128  | 825  | 214  | 1533 |
| NbUGT74N5  | Group L   | not targeted |  | 459 | Y  | Y  | Y | Y  | -0.437 | 0.320 | 2.24E-01 | -0.104 | 0.320 | 9.54E-01 | 0.521  | 0.320 | 3.90E-01 | 1.545  | 0.320 | 2.85E-04 | 4116 | 2767 | 2987 | 4378 | 9270 |
| NbUGT74P8  | Group L   | not targeted |  | 446 | Y  | Y  | Y | Y  | -0.934 | 0.068 | 3.67E-42 | 0.095  | 0.069 | 6.10E-01 | 0.212  | 0.069 | 2.91E-02 | 0.199  | 0.068 | 2.73E-02 | 2985 | 1666 | 1561 | 1808 | 1793 |
| NbUGT74P9  | Group L   | not targeted |  | 450 | Y  | Y  | Y | Y  | -3.511 | 0.438 | 6.28E-15 | 0.381  | 0.449 | 8.21E-01 | 1.213  | 0.445 | 6.72E-02 | -0.592 | 0.459 | 3.68E-01 | 402  | 36   | 27   | 70   | 16   |
| NbUGT75A4  | Group L   | not targeted |  | 474 | Y  | no | Y | Y  | -1.449 | 0.242 | 6.89E-09 | -0.124 | 0.242 | 9.19E-01 | 0.815  | 0.242 | 1.39E-02 | 1.080  | 0.242 | 7.75E-04 | 4119 | 1338 | 1462 | 2619 | 3165 |
| NbUGT75A5  | Group L   | not targeted |  | 482 | Y  | no | Y | Y  | 0.794  | 0.605 | 2.43E-01 | -0.227 | 0.604 | 9.47E-01 | 0.660  | 0.603 | 6.27E-01 | 3.151  | 0.603 | 7.53E-05 | 57   | 100  | 125  | 230  | 1997 |
| NbUGT75S2  | Group L   | not targeted |  | 465 | Y  | no | Y | Y  | 5.089  | 0.456 | 7.47E-28 | -0.036 | 0.421 | 9.92E-01 | -0.173 | 0.421 | 8.95E-01 | 1.820  | 0.420 | 1.12E-03 | 7    | 473  | 486  | 426  | 1942 |
| NbUGT84A75 | Group L   | not targeted |  | 504 | Y  | no | Y | Y  | 0.874  | 0.670 | 2.46E-01 | -0.542 | 0.669 | 8.34E-01 | 0.389  | 0.666 | 8.34E-01 | 3.112  | 0.664 | 4.22E-04 | 5    | 9    | 17   | 26   | 329  |
| NbUGT84A76 | Group L   | not targeted |  | 494 | Y  | no | Y | Y  | 3.938  | 0.491 | 5.64E-15 | 0.025  | 0.407 | 9.94E-01 | 0.089  | 0.407 | 9.51E-01 | 1.116  | 0.403 | 3.50E-02 | 2    | 81   | 79   | 85   | 184  |
| NbUGT92G9  | Group M   | not targeted |  | 496 | Y  | Y  | Y | Y  | -0.852 | 0.118 | 2.88E-12 | 0.121  | 0.121 | 7.65E-01 | -0.081 | 0.122 | 8.04E-01 | 0.409  | 0.119 | 1.03E-02 | 705  | 423  | 389  | 368  | 519  |
| NbUGT82E1  | Group N   | not targeted |  | 441 | Y  | Y  | Y | no | -1.868 | 0.197 | 1.85E-20 | 0.691  | 0.204 | 2.17E-02 | 0.923  | 0.203 | 2.34E-04 | 0.498  | 0.205 | 6.33E-02 | 282  | 123  | 75   | 145  | 108  |
| NbUGT93S1  | Group O   | not targeted |  | 476 | Y  | Y  | Y | Y  | -0.190 | 0.390 | 6.87E-01 | 0.475  | 0.391 | NA       | 0.000  | 0.390 | NA       | 0.000  | 0.390 | 1.00E+00 | 4    | 12   | 0    | 0    | 0    |
| NbUGT93S2  | Group O   | not targeted |  | 459 | Y  | Y  | Y | Y  | -1.744 | 0.319 | 1.35E-07 | -0.337 | 0.328 | 7.56E-01 | 0.328  | 0.324 | 6.61E-01 | 1.081  | 0.320 | 1.15E-02 | 308  | 67   | 86   | 110  | 190  |
| NbUGT93T1  | Group O   | not targeted |  | 468 | Y  | Y  | Y | Y  | 5.308  | 0.323 | 3.66E-59 | 0.498  | 0.297 | 4.77E-01 | 0.281  | 0.297 | 6.89E-01 | 1.315  | 0.297 | 8.65E-04 | 27   | 2065 | 1438 | 1763 | 3734 |
| NbUGT93T2  | Group O   | not targeted |  | 464 | Y  | Y  | Y | Y  | 0.636  | 0.139 | 1.12E-05 | -0.186 | 0.138 | 6.22E-01 | -0.185 | 0.138 | 5.17E-01 | -0.345 | 0.138 | 5.65E-02 | 1313 | 1799 | 2049 | 1801 | 1609 |
| NbUGT93U1  | Group O   | not targeted |  | 471 | Y  | Y  | Y | Y  | 0.348  | 0.118 | 5.48E-03 | -0.161 | 0.116 | 6.06E-01 | -0.325 | 0.117 | 6.25E-02 | -0.283 | 0.117 | 6.44E-02 | 479  | 547  | 612  | 488  | 502  |
| NbUGT709B3 | Group P   | not targeted |  | 471 | no | Y  | Y | Y  | 5.917  | 0.408 | 1.76E-46 | 0.051  | 0.238 | 9.74E-01 | 0.034  | 0.239 | 9.70E-01 | -0.319 | 0.239 | 3.49E-01 | 2    | 296  | 286  | 293  | 227  |
| NbUGT709J6 | Group P   | not targeted |  | 475 | Y  | Y  | Y | Y  | -1.040 | 0.123 | 1.35E-16 | 0.029  | 0.123 | 9.70E-01 | 0.366  | 0.123 | 3.84E-02 | 0.458  | 0.123 | 5.27E-03 | 3540 | 1746 | 1712 | 2211 | 2359 |
| NbUGT709L7 | Group P   | not targeted |  | 531 | no | Y  | Y | Y  | 0.182  | 0.078 | 3.04E-02 | -0.147 | 0.078 | 3.80E-01 | -0.054 | 0.078 | 7.88E-01 | 0.069  | 0.077 | 5.60E-01 | 2174 | 2226 | 2466 | 2374 | 2587 |
| NbUGT709Q1 | Group P   | not targeted |  | 491 | no | Y  | Y | Y  | 0.861  | 0.097 | 5.27E-18 | 0.060  | 0.095 | 8.88E-01 | 0.181  | 0.095 | 2.79E-01 | -0.154 | 0.095 | 2.43E-01 | 978  | 1858 | 1782 | 2021 | 1600 |
| NbUGT709Q2 | Group P   | not targeted |  | 381 | no | Y  | Y | Y  | -0.491 | 0.272 | 1.01E-01 | -0.040 | 0.273 | 9.84E-01 | -0.544 | 0.274 | 2.47E-01 | -0.801 | 0.274 | 2.68E-02 | 689  | 470  | 484  | 327  | 271  |
| NbUGT709U2 | Group P   | not targeted |  | 585 | Y  | Y  | Y | Y  | 0.937  | 0.339 | 9.67E-03 | 0.383  | 0.334 | 7.09E-01 | 1.069  | 0.334 | 2.15E-02 | 1.435  | 0.333 | 1.20E-03 | 117  | 311  | 235  | 516  | 675  |
| NbUGT95F1  | undefined | not targeted |  | 479 | Y  | Y  | Y | no | -3.364 | 0.198 | 4.70E-63 | 0.711  | 0.205 | 1.77E-02 | 0.807  | 0.205 | 2.44E-03 | -0.295 | 0.212 | 3.26E-01 | 1228 | 189  | 114  | 202  | 92   |

**Supplementary Table 3** Reported activities of Family 1 UGTs groups targeted for Cas9-induced mutagenesis in *N. benthamiana*

| T1 Line         | Mutated NbUGT |       |        |       | Groups  | Reported activities for this group                                                                                                                                                                                                                                            |
|-----------------|---------------|-------|--------|-------|---------|-------------------------------------------------------------------------------------------------------------------------------------------------------------------------------------------------------------------------------------------------------------------------------|
| NbCas9-0780B-01 | 94E7          |       |        |       | A       | <b>Group A includes GTs that:</b><br>- catalyze glycosidic branch elongation <sup>2</sup><br>- catalyze the formation of di/tri-glycosides <sup>3,4</sup><br>- are active on soyasaponins <sup>5</sup>                                                                        |
| 0720-06-01      | 73A24         | 73A25 | 73Q2   | 73A32 | D       | <b>Group D includes GTs that are active on:</b><br>- geraniol <sup>6</sup><br>- triterpenoids <sup>2,6</sup><br>- flavonoids <sup>7</sup><br>- benzoates <sup>8</sup><br>- brassinosteroids <sup>9</sup>                                                                      |
| 0720-06-03      | 73A24         | 73A25 | 73Q2   | 73A32 |         |                                                                                                                                                                                                                                                                               |
| 0724-37-06      | 72AY1         | 72AX1 | 72B34  | 72B58 | E       | <b>Group E includes GTs that are active on:</b><br>- terpenoids <sup>6</sup> including geraniol <sup>1</sup><br>- isoflavones <sup>10</sup><br>- dihydrochalcones <sup>11</sup><br>benzoates <sup>12</sup>                                                                    |
| 0724-22a-06     | 72AY1         | 72AX1 | 72B34  | 72B35 |         |                                                                                                                                                                                                                                                                               |
| NbCas9-0779A-01 | 71A57         |       |        |       |         |                                                                                                                                                                                                                                                                               |
| 0361-34-05      | 85A73         | 85A74 | 86A104 |       | G       | <b>Group G includes GTs that are active on:</b><br>- terpenoids <sup>6</sup> including geraniol <sup>1</sup><br>- cytokinins <sup>12</sup><br>- cyanogenic glucosides <sup>13</sup><br>- abscisic acid <sup>14</sup><br>-cyanohydrins <sup>13</sup><br>-steviol <sup>15</sup> |
| 0361-34-08      | 85A73         | 85A74 | 86A104 |       |         |                                                                                                                                                                                                                                                                               |
| NbCas9-0781B-03 | 72AY1         | 85A73 |        |       | E, G    | <i>see above</i>                                                                                                                                                                                                                                                              |
| NbCas9-0777B-01 | 74P7          |       |        |       | L       | <b>Group L includes GTs that are active on:</b><br>- phenylpropanoids <sup>16</sup><br>- benzoates <sup>7</sup><br>- auxin <sup>17</sup><br>- hydroxycinnamates <sup>2</sup>                                                                                                  |
| NbCas9-0778B-05 | 73E22         | 71A56 | 93T3   |       | D, E, O | <i>Group D and E see above</i><br><b>Group O includes GTs that are active on:</b><br>- cytokinins <sup>18</sup>                                                                                                                                                               |

**Supplementary Table 4** Coding sequences cloned into pEAQ-HT-DEST1

| Enzyme |                                            | Organism                                              | Key Reference                                                                | Accession # |
|--------|--------------------------------------------|-------------------------------------------------------|------------------------------------------------------------------------------|-------------|
| CrDXS  | 1-deoxy-D-xylulose 5-phosphate synthase    | <i>Catharanthus roseus</i><br>(Madagascar periwinkle) | this study                                                                   | DQ848672    |
| CrGPPS | geranyl diphosphate synthase large subunit | <i>Catharanthus roseus</i><br>(Madagascar periwinkle) | Rai et al (2013) <sup>19</sup>                                               | JX417183    |
| CrGES  | geraniol synthase                          | <i>Catharanthus roseus</i><br>(Madagascar periwinkle) | Simkin et al (2013) <sup>20</sup>                                            | JN882024    |
| CrG8H  | geraniol 8-oxidase                         | <i>Catharanthus roseus</i><br>(Madagascar periwinkle) | Collu et al (2001) <sup>21</sup>                                             | AJ251269    |
| CrGOR  | 8-hydroxygeraniol reductase                | <i>Catharanthus roseus</i><br>(Madagascar periwinkle) | Miettinen et al (2014) <sup>22</sup> and Krithika et al (2015) <sup>23</sup> | KF302069    |
| CrISY  | iridoid synthase                           | <i>Catharanthus roseus</i><br>(Madagascar periwinkle) | Geu-Flores et al (2012) <sup>24</sup>                                        | JX974564    |
| GFP    | green fluorescent protein                  | <i>Aequorea victoria</i><br>(crystal jelly)           | Chalfie et al (1994) <sup>25</sup>                                           | AF183395.1  |



**Supplementary Table 5** Coding sequences cloned into pUAP1 (Addgene #63674) resulting in Level 0 standard parts. Asterisk indicates that the sequence encoding the native transit peptide was removed.

| Enzyme   |                                                                                               | Organism                                             | Key reference(s)                                                                             | Accession #              | Level 0 plasmid name (AATG-GCTT) | Addgene #                      |
|----------|-----------------------------------------------------------------------------------------------|------------------------------------------------------|----------------------------------------------------------------------------------------------|--------------------------|----------------------------------|--------------------------------|
| CrDXS*   | 1-deoxy-D-xylulose 5-phosphate synthase                                                       | <i>Catharanthus roseus</i> (Madagascar periwinkle)   | <i>this study</i>                                                                            | DQ848672                 | pEPQD0CM0065                     | 177019                         |
| AstHMGR  | truncated 3-hydroxy-3-methylglutaryl-coenzyme A reductase                                     | <i>Avena strigosa</i> (oat)                          | Reed <i>et al.</i> (2017) <sup>26</sup>                                                      | KY284573                 | pL0-AstHMGR**                    | n/a - a gift from Anne Osbourn |
| PaGPPS*  | geranyl pyrophosphate synthase; geranyl diphosphate synthase                                  | <i>Picea abies</i> (Norway spruce)                   | Schmidt <i>et al.</i> (2010) <sup>27</sup>                                                   | GQ369788                 | pEPQD0CM0818                     | 177020                         |
| CrGES*   | geraniol synthase                                                                             | <i>Catharanthus roseus</i> (Madagascar periwinkle)   | Simkin <i>et al.</i> (2013) <sup>20</sup>                                                    | JN882024                 | pEPQD0CM0063                     | 177021                         |
| CrG8H    | geraniol 8-oxidase; geraniol-10-hydroxylase; CYP76B6                                          | <i>Catharanthus roseus</i> (Madagascar periwinkle)   | Collu <i>et al.</i> (2001) <sup>21</sup>                                                     | AJ251269                 | pEPQD0CM0058                     | 177022                         |
| CrGOR    | 8-hydroxygeraniol oxidoreductase; 10-hydroxygeraniol oxidoreductase; alcohol dehydrogenase 10 | <i>Catharanthus roseus</i> (Madagascar periwinkle)   | Miettinen <i>et al.</i> (2014) <sup>22</sup> and Krithika <i>et al.</i> (2015) <sup>23</sup> | KF302069                 | pEPQD0CM0059                     | 177023                         |
| CrISY    | iridoid synthase                                                                              | <i>Catharanthus roseus</i> (Madagascar periwinkle)   | Geu-Flores <i>et al.</i> (2012)                                                              | JX974564                 | pEPQD0CM0060                     | 177024                         |
| NmMLPL   | major latex protein-like                                                                      | <i>Nepeta mussinii</i> (aka <i>Nepeta racemosa</i> ) | Lichman <i>et al.</i> (2020) <sup>28</sup> and Lichman <i>et al.</i> (2019) <sup>29</sup>    | MT108267.1               | pEPQD0CM0068                     | 177025                         |
| CrIO     | iridoid oxidase; CYP76A26                                                                     | <i>Catharanthus roseus</i> (Madagascar periwinkle)   | Miettinen <i>et al.</i> (2014) <sup>22</sup> and Salim <i>et al.</i> (2014) <sup>30</sup>    | KF302066                 | pEPQD0CM0061                     | 177026                         |
| Cr7-DLGT | 7-deoxyloganetic acid glucosyl transferase; UGT709C2                                          | <i>Catharanthus roseus</i> (Madagascar periwinkle)   | Miettinen <i>et al.</i> (2014) <sup>22</sup> and Asada <i>et al.</i> (2013) <sup>31</sup>    | KF302068                 | pEPQD0CM0062                     | 177027                         |
| Cr7-DLH  | 7-deoxyloganic acid hydroxylase; CYP72A224                                                    | <i>Catharanthus roseus</i> (Madagascar periwinkle)   | Miettinen <i>et al.</i> (2014) <sup>22</sup> and Salim <i>et al.</i> (2014) <sup>30</sup>    | KF302067                 | pEPQD0CM0762                     | 177028                         |
| CrLAMT   | loganic acid O-methyltransferase                                                              | <i>Catharanthus roseus</i> (Madagascar periwinkle)   | Murata <i>et al.</i> (2008) <sup>32</sup>                                                    | EU057974                 | pEPQD0CM0763                     | 177029                         |
| CrSLS    | secologanin synthase; CYP72C                                                                  | <i>Catharanthus roseus</i> (Madagascar periwinkle)   | Irmeler <i>et al.</i> (2000) <sup>33</sup>                                                   | KF309242.1 or KF415117.1 | pEPQD0CM0764                     | 177030                         |
| CrTDC    | tryptophan decarboxylase                                                                      | <i>Catharanthus roseus</i> (Madagascar periwinkle)   | de Luca <i>et al.</i> (1989) <sup>34</sup>                                                   | M25151                   | pEPQD0CM0765                     | 177031                         |
| CrSTR    | strictosidine synthase                                                                        | <i>Catharanthus roseus</i> (Madagascar periwinkle)   | Pasquali <i>et al.</i> (1992) <sup>35</sup>                                                  | X61932                   | pEPQD0CM0766                     | 177032                         |

**Supplementary Table 6** Level 1 expression constructs assembled from Level 0 parts using the Plant MoClo Toolkit (Addgene Kit #100000044)

|                                                                            | (Promoter+5'UTR) or (Promoter)+(5'UTR+cTP) |           | CDS                                                         | 3'UTR + Terminator | Level 1 Acceptor |
|----------------------------------------------------------------------------|--------------------------------------------|-----------|-------------------------------------------------------------|--------------------|------------------|
|                                                                            | overhangs created by Bsal:                 | GGAG-TACT | TACT-AATG                                                   | AATG-GCTT          | GCTT-CGCT        |
| pEPQD1CB0104 (P6_35SshortTMV-P19-35Sterm)                                  | pICH51277                                  |           | pICH44022                                                   | pUAP41414          | pICH47781        |
| pEPQD1CB0817 (P1_35SshortTMV-AstHMGR-35Sterm)                              | pICH51277                                  |           | pL0-AstHMGR                                                 | pUAP41414          | pICH47732        |
| pEPQD1CB0107 (P1_35SshortTMV-cTP_CrDXS2-35Sterm)                           | pICH41388                                  | pICH78133 | pEPQD0CM0065                                                | pUAP41414          | pICH47732        |
| pEPQD1CB0108 (P2_35SshortTMV-PaGPPS1-35Sterm)                              | pICH51277                                  |           | pEPQD0CM0818                                                | pUAP41414          | pICH47742        |
| pEPQD1CB0109 (P2_35SshortTMV-cTP_PaGPPS1-35Sterm)                          | pICH41388                                  | pICH78133 | pEPQD0CM0818                                                | pUAP41414          | pICH47742        |
| pEPQD1CB0110 (P3_35SshortTMV-CrGES-35Sterm)                                | pICH51277                                  |           | pEPQD0CM0063                                                | pUAP41414          | pICH47751        |
| pEPQD1CB0112 (P3_35SshortTMV-cTP_CrGES-35Sterm)                            | pICH41388                                  | pICH78133 | pEPQD0CM0063                                                | pUAP41414          | pICH47751        |
| pEPQD1CB0113 (P4_35SshortTMV-CrG8H-35Sterm)                                | pICH51277                                  |           | pEPQD0CM0058                                                | pUAP41414          | pICH47761        |
| pEPQD1CB0114 (P4_35SshortTMV-cTP_CrG8H-35Sterm)                            | pICH41388                                  | pICH78133 | pEPQD0CM0058                                                | pUAP41414          | pICH47761        |
| pEPQD1CB0115 (P5_35SshortTMV-Cr8HGO/GOR-35Sterm)                           | pICH51277                                  |           | pEPQD0CM0059                                                | pUAP41414          | pICH47772        |
| pEPQD1CB0116 (P5_35SshortTMV-cTP_Cr8HGO/GOR-35Sterm)                       | pICH41388                                  | pICH78133 | pEPQD0CM0059                                                | pUAP41414          | pICH47772        |
| pEPQD1CB0117 (P6_35SshortTMV-CrISY-35Sterm)                                | pICH51277                                  |           | pEPQD0CM0060                                                | pUAP41414          | pICH47781        |
| pEPQD1CB0118 (P6_35SshortTMV-cTP_CrISY-35Sterm)                            | pICH41388                                  | pICH78133 | pEPQD0CM0060                                                | pUAP41414          | pICH47781        |
| pEPQD1CB0119 (P1_35SshortTMV-NmMLP-35Sterm)                                | pICH51277                                  |           | pEPQD0CM0068                                                | pUAP41414          | pICH47732        |
| pEPQD1CB0120 (P1_35SshortTMV-cTP_NmMLP-35Sterm)                            | pICH41388                                  | pICH78133 | pEPQD0CM0068                                                | pUAP41414          | pICH47732        |
| pEPQD1CB0121 (P2_35SshortTMV-CrIO-35Sterm)                                 | pICH51277                                  |           | pEPQD0CM0061                                                | pUAP41414          | pICH47742        |
| pEPQD1CB0122 (P2_35SshortTMV-cTP_CrIO-35Sterm)                             | pICH41388                                  | pICH78133 | pEPQD0CM0061                                                | pUAP41414          | pICH47742        |
| pEPQD1CB0123 (P3_35SshortTMV-CrDLGT-35Sterm)                               | pICH51277                                  |           | pEPQD0CM0062                                                | pUAP41414          | pICH47751        |
| pEPQD1CB0124 (P3_35SshortTMV-cTP_CrDLGT-35Sterm)                           | pICH41388                                  | pICH78133 | pEPQD0CM0062                                                | pUAP41414          | pICH47751        |
| pEPQD1CB0767 (P4_35SshortTMV-Cr7DLH-35Sterm)                               | pICH51277                                  |           | pEPQD0CM0762                                                | pUAP41414          | pICH47761        |
| pEPQD1CB0768 (P4_35SshortTMV-cTP_Cr7DLH-35Sterm)                           | pICH41388                                  | pICH78133 | pEPQD0CM0762                                                | pUAP41414          | pICH47761        |
| pEPQD1CB0769 (P5_35SshortTMV-CrLAMT-35Sterm)                               | pICH51277                                  |           | pEPQD0CM0763                                                | pUAP41414          | pICH47772        |
| pEPQD1CB0770 (P5_35SshortTMV-cTP_CrLAMT-35Sterm)                           | pICH41388                                  | pICH78133 | pEPQD0CM0763                                                | pUAP41414          | pICH47772        |
| pEPQD1CB0771 (P6_35SshortTMV-CrSLS-35Sterm)                                | pICH51277                                  |           | pEPQD0CM0764                                                | pUAP41414          | pICH47781        |
| pEPQD1CB0772 (P6_35SshortTMV-cTP_CrSLS-35Sterm)                            | pICH41388                                  | pICH78133 | pEPQD0CM0764                                                | pUAP41414          | pICH47781        |
| pEPQD1CB0773 (P1_35SshortTMV-CrTDC-35Sterm)                                | pICH51277                                  |           | pEPQD0CM0765                                                | pUAP41414          | pICH47732        |
| pEPQD1CB0774 (P1_35SshortTMV-cTP_CrTDC-35Sterm)                            | pICH41388                                  | pICH78133 | pEPQD0CM0765                                                | pUAP41414          | pICH47732        |
| pEPQD1CB0775 (P2_35SshortTMV-CrSTR-35Sterm)                                | pICH51277                                  |           | pEPQD0CM0766                                                | pUAP41414          | pICH47742        |
| pEPQD1CB0776 (P2_35SshortTMV-cTP_CrSTR-35Sterm)                            | pICH41388                                  | pICH78133 | pEPQD0CM0766                                                | pUAP41414          | pICH47742        |
| <b>Parts from Plant MoClo Parts Kit (Addgene Kit #100000047)</b>           |                                            |           | <b>Abbreviations</b>                                        |                    |                  |
| pICH51277 (CaMV 35S short promoter + TMV omega 5'UTR) Addgene#50268        |                                            |           | CaMV = Cauliflower mosaic virus                             |                    |                  |
| pICH41388 (CaMV 35S short promoter) Addgene#50253                          |                                            |           | TMV = Tobacco Mosaic Virus                                  |                    |                  |
| pICH78133 (TMV omega 5'UTR+chloroplast transit peptide RbcS) Addgene#50292 |                                            |           | P19 suppressor of gene silencing (Tomato Bushy Stunt Virus) |                    |                  |
| pUAP41414 (CMV 3'UTR+terminator) Addgene#50337                             |                                            |           | cTP = chloroplast transit peptide                           |                    |                  |
| pICH44022 (L0, P19 CDS) Addgene#50330                                      |                                            |           |                                                             |                    |                  |
| pICH47732 (L1 P1 acceptor forward) Addgene#48000                           |                                            |           |                                                             |                    |                  |
| pICH47742 (L1 P2 acceptor forward) Addgene#48001                           |                                            |           |                                                             |                    |                  |
| pICH47751 (L1 P3 acceptor forward) Addgene#48002                           |                                            |           |                                                             |                    |                  |
| pICH47761 (L1 P4 acceptor forward) Addgene#48003                           |                                            |           |                                                             |                    |                  |
| pICH47772 (L1 P5 acceptor forward) Addgene#48004                           |                                            |           |                                                             |                    |                  |
| pICH47781 (L1 P6 acceptor forward) Addgene#48005                           |                                            |           |                                                             |                    |                  |

**Supplementary Table 7.** Ratios of *A. tumefaciens* strains containing pEAQ plasmid vectors infiltrated into *N. benthamiana*

|                    | <b>Low geraniol</b> | <b>High geraniol</b> | <b>Nepetalactol</b> | <b>Infiltration control</b> |
|--------------------|---------------------|----------------------|---------------------|-----------------------------|
| <b>GFP</b>         | 6 units             | 1 unit               | 1 unit              | 1 unit                      |
| <b>CrDXS</b>       |                     | 1 unit               | 1 unit              |                             |
| <b>CrGGPPS.LSU</b> |                     | 1 unit               | 1 unit              |                             |
| <b>CrGES</b>       | 1 unit              | 1 unit               | 1 unit              |                             |
| <b>CrG8H</b>       |                     |                      | 1 unit              |                             |
| <b>Cr8HGO/GOR</b>  |                     |                      | 1 unit              |                             |
| <b>CrISY</b>       |                     |                      | 1 unit              |                             |

**Supplementary Table 8. Family 1 UDP-glycosyltransferases (UGTs)**

| Enzyme             | Group code     | Organism                                  | Genbank ID                      | Notes                                                                                       |
|--------------------|----------------|-------------------------------------------|---------------------------------|---------------------------------------------------------------------------------------------|
| <b>AdGT4</b>       | <b>Group G</b> | <i>Actinidia deliciosa</i><br>(kiwifruit) | AIL51400                        | Activity on geraniol reported by Yauk <i>et al. Plant J.</i> 80:317–30 (2014) <sup>36</sup> |
| <b>AtUGT79B1</b>   | <b>Group A</b> | <i>Arabidopsis thaliana</i>               | AB018115, MJP23, 2800-4206      |                                                                                             |
| <b>AtUGT79B100</b> | <b>Group A</b> | <i>Arabidopsis thaliana</i>               | AC006193, 78745-80088           |                                                                                             |
| <b>AtUGT79B111</b> | <b>Group A</b> | <i>Arabidopsis thaliana</i>               | AC006193, 80861-82219           |                                                                                             |
| <b>AtUGT79B2</b>   | <b>Group A</b> | <i>Arabidopsis thaliana</i>               | AL161571, 70597-71964           |                                                                                             |
| <b>AtUGT79B3</b>   | <b>Group A</b> | <i>Arabidopsis thaliana</i>               | AL035602, T29A15, 13430-14791   |                                                                                             |
| <b>AtUGT79B4</b>   | <b>Group A</b> | <i>Arabidopsis thaliana</i>               | AP000606, MTO24, 63467-64813    |                                                                                             |
| <b>AtUGT79B5</b>   | <b>Group A</b> | <i>Arabidopsis thaliana</i>               | AC012561, F11F12, 44850-46196   |                                                                                             |
| <b>AtUGT79B6</b>   | <b>Group A</b> | <i>Arabidopsis thaliana</i>               | AB007644, K19P17, 59557-60918   |                                                                                             |
| <b>AtUGT79B7</b>   | <b>Group A</b> | <i>Arabidopsis thaliana</i>               | AC006567, T15G18, 32112-33440   |                                                                                             |
| <b>AtUGT79B8</b>   | <b>Group A</b> | <i>Arabidopsis thaliana</i>               | AC004786, 55469-56797           |                                                                                             |
| <b>AtUGT79B9</b>   | <b>Group A</b> | <i>Arabidopsis thaliana</i>               | AB007644, K19P17, 55445-56788   |                                                                                             |
| <b>AtUGT91A1</b>   | <b>Group A</b> | <i>Arabidopsis thaliana</i>               | AC006340, 3826-5238             |                                                                                             |
| <b>AtUGT91B1</b>   | <b>Group A</b> | <i>Arabidopsis thaliana</i>               | AB026639, 14713-16113           |                                                                                             |
| <b>AtUGT91C1</b>   | <b>Group A</b> | <i>Arabidopsis thaliana</i>               | AB025613, 26973-28355           |                                                                                             |
| AtUGT89A2          | Group B        | <i>Arabidopsis thaliana</i>               | AL162751, 85361-86758           |                                                                                             |
| AtUGT89B1          | Group B        | <i>Arabidopsis thaliana</i>               | AC016662, F2P9, 86614-88035     |                                                                                             |
| AtUGT89C1          | Group B        | <i>Arabidopsis thaliana</i>               | AC024174, 19642-20949           |                                                                                             |
| AtUGT90A1          | Group C        | <i>Arabidopsis thaliana</i>               | AC005167, F12A24, 24146-26230   |                                                                                             |
| AtUGT90A2          | Group C        | <i>Arabidopsis thaliana</i>               | AC005489, F14N23, 95228-96717   |                                                                                             |
| AtUGT90A4          | Group C        | <i>Arabidopsis thaliana</i>               | AL391149, T9L3, 73006-74878     |                                                                                             |
| <b>AtUGT73B1</b>   | <b>Group D</b> | <i>Arabidopsis thaliana</i>               | AL021961, F28A23, 51775-53366   |                                                                                             |
| <b>AtUGT73B2</b>   | <b>Group D</b> | <i>Arabidopsis thaliana</i>               | AL021961, F28A23, 48984-50524   |                                                                                             |
| <b>AtUGT73B3</b>   | <b>Group D</b> | <i>Arabidopsis thaliana</i>               | AL021961, F28A23, 176825-178270 |                                                                                             |
| <b>AtUGT73B4</b>   | <b>Group D</b> | <i>Arabidopsis thaliana</i>               | AC006248, F26H6, 11828-13404    |                                                                                             |
| <b>AtUGT73B5</b>   | <b>Group D</b> | <i>Arabidopsis thaliana</i>               | AC006248, F26H6, 8823-10458     |                                                                                             |
| <b>AtUGT73C1</b>   | <b>Group D</b> | <i>Arabidopsis thaliana</i>               | AC006282, F13K3, 61903-63378    | Low activity on geraniol (10-40%), reported by Caputi <i>et al.</i> (2008) <sup>6</sup>     |
| <b>AtUGT73C2</b>   | <b>Group D</b> | <i>Arabidopsis thaliana</i>               | AC006282, F13K3, 64414-65904    |                                                                                             |
| <b>AtUGT73C3</b>   | <b>Group D</b> | <i>Arabidopsis thaliana</i>               | AC006282, F13K3, 68990-70480    | Very low activity on geraniol (1-10%), reported by Caputi <i>et al.</i> (2008) <sup>6</sup> |
| <b>AtUGT73C4</b>   | <b>Group D</b> | <i>Arabidopsis thaliana</i>               | AC006282, F13K3, 66599-68089    |                                                                                             |
| <b>AtUGT73C5</b>   | <b>Group D</b> | <i>Arabidopsis thaliana</i>               | AC006282, F13K3, 74865-76352    | High activity on geraniol (>40%) reported by Caputi <i>et al.</i> (2008) <sup>6</sup>       |
| <b>AtUGT73C6</b>   | <b>Group D</b> | <i>Arabidopsis thaliana</i>               | AC006282, F13K3, 71711-73198    | Low activity on geraniol (10-40%), reported by Caputi <i>et al.</i> (2008) <sup>6</sup>     |
| <b>AtUGT73C7</b>   | <b>Group D</b> | <i>Arabidopsis thaliana</i>               | AL132958, T4D2, 26553-28025     |                                                                                             |
| <b>AtUGT73D1</b>   | <b>Group D</b> | <i>Arabidopsis thaliana</i>               | AL132958, T4D2, 21804-23327     |                                                                                             |
| <b>AtUGT71B1</b>   | <b>Group E</b> | <i>Arabidopsis thaliana</i>               | AB025634, MSD21, 21447-22865    |                                                                                             |

| Enzyme    | Group code | Organism                    | Genbank ID                                        | Notes                                                                                       |
|-----------|------------|-----------------------------|---------------------------------------------------|---------------------------------------------------------------------------------------------|
| AtUGT71B2 | Group E    | <i>Arabidopsis thaliana</i> | AB025634, MSD21, 23981-25438                      |                                                                                             |
| AtUGT71B5 | Group E    | <i>Arabidopsis thaliana</i> | AL161541, 37302-38738                             |                                                                                             |
| AtUGT71B6 | Group E    | <i>Arabidopsis thaliana</i> | AB025634, MSD21, 31933-33372                      |                                                                                             |
| AtUGT71B7 | Group E    | <i>Arabidopsis thaliana</i> | AB025634, MSD21, 33809-35296                      |                                                                                             |
| AtUGT71B8 | Group E    | <i>Arabidopsis thaliana</i> | AB025634, MSD21, 37125-38567                      |                                                                                             |
| AtUGT71C1 | Group E    | <i>Arabidopsis thaliana</i> | AC005496, T27A16, 51968-53413                     |                                                                                             |
| AtUGT71C2 | Group E    | <i>Arabidopsis thaliana</i> | AC005496, T27A16, 48813-50237                     | Very low activity on geraniol (1-10%), reported by Caputi <i>et al.</i> (2008) <sup>6</sup> |
| AtUGT71C3 | Group E    | <i>Arabidopsis thaliana</i> | AC067971, F10K1.3, 12382-13812                    |                                                                                             |
| AtUGT71C4 | Group E    | <i>Arabidopsis thaliana</i> | AC067971, F10K1.4, 14158-15597                    |                                                                                             |
| AtUGT71C5 | Group E    | <i>Arabidopsis thaliana</i> | AC067971, F10K1, 16229-17671                      |                                                                                             |
| AtUGT71D1 | Group E    | <i>Arabidopsis thaliana</i> | AC005496, T27A16, 45718-47121                     |                                                                                             |
| AtUGT71D2 | Group E    | <i>Arabidopsis thaliana</i> | AC005496, T27A16, 40783-42186                     |                                                                                             |
| AtUGT72B1 | Group E    | <i>Arabidopsis thaliana</i> | AL161491, 75572-77014                             |                                                                                             |
| AtUGT72B2 | Group E    | <i>Arabidopsis thaliana</i> | AC023628, F6F3.19, 89227-90669                    |                                                                                             |
| AtUGT72B3 | Group E    | <i>Arabidopsis thaliana</i> | AC023628, F6F3.22, 95474-96919                    |                                                                                             |
| AtUGT72C1 | Group E    | <i>Arabidopsis thaliana</i> | AL161590, 17779-19152                             |                                                                                             |
| AtUGT72D1 | Group E    | <i>Arabidopsis thaliana</i> | AC006135, F24H14, 59343-60755                     |                                                                                             |
| AtUGT72E1 | Group E    | <i>Arabidopsis thaliana</i> | AL132979, T3A5, 67179-68615                       |                                                                                             |
| AtUGT72E2 | Group E    | <i>Arabidopsis thaliana</i> | AB018119, MSN2, 30560-32005                       |                                                                                             |
| AtUGT72E3 | Group E    | <i>Arabidopsis thaliana</i> | AF077407, F9D12, 79017-80462                      |                                                                                             |
| AtUGT88A1 | Group E    | <i>Arabidopsis thaliana</i> | AP000373, 56926-58404                             | Low activity on geraniol (10-40%), reported by Caputi <i>et al.</i> (2008) <sup>6</sup>     |
| AtUGT78D1 | Group F    | <i>Arabidopsis thaliana</i> | AC009917, F26G16, 65767-67224                     |                                                                                             |
| AtUGT78D2 | Group F    | <i>Arabidopsis thaliana</i> | AL391141, F2K13, 64922-66486                      |                                                                                             |
| AtUGT78D3 | Group F    | <i>Arabidopsis thaliana</i> | AL391141, F2K13, 60292-61817                      |                                                                                             |
| AtUGT85A1 | Group G    | <i>Arabidopsis thaliana</i> | AC006551, F12K8, 101428-104184                    | High activity on geraniol (>40%) reported by Caputi <i>et al.</i> (2008) <sup>6</sup>       |
| AtUGT85A2 | Group G    | <i>Arabidopsis thaliana</i> | AC068562, 3508-5967                               | High activity on geraniol (>40%) reported by Caputi <i>et al.</i> (2008) <sup>6</sup>       |
| AtUGT85A3 | Group G    | <i>Arabidopsis thaliana</i> | AC006551, F12K8, 105703-107198; AC068562, T16E15, |                                                                                             |
| AtUGT85A4 | Group G    | <i>Arabidopsis thaliana</i> | AC013430, 74211-75743                             | High activity on geraniol (>40%) reported by Caputi <i>et al.</i> (2008) <sup>6</sup>       |
| AtUGT85A5 | Group G    | <i>Arabidopsis thaliana</i> | AC068562, T16E15.2, 1156-2919                     | Very low activity on geraniol (1-10%), reported by Caputi <i>et al.</i> (2008) <sup>6</sup> |
| AtUGT85A7 | Group G    | <i>Arabidopsis thaliana</i> | AC068562, T16E15.5, 8945-10571                    | High activity on geraniol (>40%) reported by Caputi <i>et al.</i> (2008) <sup>6</sup>       |
| AtUGT76B1 | Group H    | <i>Arabidopsis thaliana</i> | AC073395, F11B9, 93894-95312                      |                                                                                             |
| AtUGT76C1 | Group H    | <i>Arabidopsis thaliana</i> | AB017060, K18J17                                  |                                                                                             |

| Enzyme      | Group code | Organism                    | Genbank ID                                         | Notes                                                                                       |
|-------------|------------|-----------------------------|----------------------------------------------------|---------------------------------------------------------------------------------------------|
| AtUGT76C2   | Group H    | <i>Arabidopsis thaliana</i> | AB005237, MJJ3, 86268-87835; AB017060, K18J17, 1-2 |                                                                                             |
| AtUGT76C3   | Group H    | <i>Arabidopsis thaliana</i> | AB017060, K18J17, 7401-9269                        |                                                                                             |
| AtUGT76C4   | Group H    | <i>Arabidopsis thaliana</i> | AB017060, K18J17, 2536-4403                        |                                                                                             |
| AtUGT76C5   | Group H    | <i>Arabidopsis thaliana</i> | AB017060, K18J17, 5455-6900                        |                                                                                             |
| AtUGT76D1   | Group H    | <i>Arabidopsis thaliana</i> | AC002505, T9J22, 49628-51237                       | Low activity on geraniol (10-40%), reported by Caputi <i>et al.</i> (2008) <sup>6</sup>     |
| AtUGT76E1   | Group H    | <i>Arabidopsis thaliana</i> | AB025604, F2O15, 69708-71158                       |                                                                                             |
| AtUGT76E111 | Group H    | <i>Arabidopsis thaliana</i> | AL133314, F12A12, 91897-93329                      | Very low activity on geraniol (1-10%), reported by Caputi <i>et al.</i> (2008) <sup>6</sup> |
| AtUGT76E122 | Group H    | <i>Arabidopsis thaliana</i> | AL133314, F12A12, 88508-89949                      | High activity on geraniol (>40%) reported by Caputi <i>et al.</i> (2008) <sup>6</sup>       |
| AtUGT76E2   | Group H    | <i>Arabidopsis thaliana</i> | AB025604, F2O15, 72621-74054                       | High activity on geraniol (>40%) reported by Caputi <i>et al.</i> (2008) <sup>6</sup>       |
| AtUGT76E3   | Group H    | <i>Arabidopsis thaliana</i> | AL096859, T6H20, 92466-93881                       |                                                                                             |
| AtUGT76E4   | Group H    | <i>Arabidopsis thaliana</i> | AL133314, F12A12, 96862-98299                      |                                                                                             |
| AtUGT76E5   | Group H    | <i>Arabidopsis thaliana</i> | AL096859, T6H20, 81966-83384                       |                                                                                             |
| AtUGT76E6   | Group H    | <i>Arabidopsis thaliana</i> | AL133314, F12A12, 94420-95845                      |                                                                                             |
| AtUGT76E7   | Group H    | <i>Arabidopsis thaliana</i> | AB028606, F16F17, 34184-35615                      |                                                                                             |
| AtUGT76E9   | Group H    | <i>Arabidopsis thaliana</i> | AB028606, F16F17, 7449-9225                        |                                                                                             |
| AtUGT76F1   | Group H    | <i>Arabidopsis thaliana</i> | AL161667, F1116, 61935-63899                       |                                                                                             |
| AtUGT76F2   | Group H    | <i>Arabidopsis thaliana</i> | AL161667, F1116, 59290-61366                       |                                                                                             |
| AtUGT83A1   | Group I    | <i>Arabidopsis thaliana</i> | AC011664, F1C9, 38853-40497                        |                                                                                             |
| AtUGT87A1   | Group J    | <i>Arabidopsis thaliana</i> | AC004165, T27E13, 50431-51895                      |                                                                                             |
| AtUGT87A2   | Group J    | <i>Arabidopsis thaliana</i> | AC004165, 47973-49464                              |                                                                                             |
| AtUGT86A1   | Group K    | <i>Arabidopsis thaliana</i> | AC006922, T1J8, 88046-89708                        |                                                                                             |
| AtUGT86A2   | Group K    | <i>Arabidopsis thaliana</i> | AC005851, 28144-30597                              |                                                                                             |
| AtUGT74B1   | Group L    | <i>Arabidopsis thaliana</i> | AC002396, F3I6, 4859-6322                          |                                                                                             |
| AtUGT74C1   | Group L    | <i>Arabidopsis thaliana</i> | AC006533, T9H9, 34299-36197                        |                                                                                             |
| AtUGT74D1   | Group L    | <i>Arabidopsis thaliana</i> | AC006533, T9H9, 13342-15897                        |                                                                                             |
| AtUGT74E1   | Group L    | <i>Arabidopsis thaliana</i> | AC007153, F3F20, 82737-84239                       |                                                                                             |
| AtUGT74E2   | Group L    | <i>Arabidopsis thaliana</i> | AC007153, F3F20, 84720-86163                       |                                                                                             |
| AtUGT74F1   | Group L    | <i>Arabidopsis thaliana</i> | AC002333, F18O19, 82534-84019                      |                                                                                             |
| AtUGT74F2   | Group L    | <i>Arabidopsis thaliana</i> | AC002333, F18O19, 77132-78568                      |                                                                                             |
| AtUGT75B1   | Group L    | <i>Arabidopsis thaliana</i> | AC007153, F3F20, 27198-28607                       |                                                                                             |
| AtUGT75B2   | Group L    | <i>Arabidopsis thaliana</i> | AC007153, F3F20, 18020-19387                       |                                                                                             |
| AtUGT75C1   | Group L    | <i>Arabidopsis thaliana</i> | AL161538, 19874-21244                              |                                                                                             |
| AtUGT75D1   | Group L    | <i>Arabidopsis thaliana</i> | AL161542, 3576-5000                                |                                                                                             |
| AtUGT84A1   | Group L    | <i>Arabidopsis thaliana</i> | AL161541, 167121-168572                            |                                                                                             |

| Enzyme              | Group code | Organism                                           | Genbank ID                    | Notes                                                                                |
|---------------------|------------|----------------------------------------------------|-------------------------------|--------------------------------------------------------------------------------------|
| AtUGT84A2           | Group L    | <i>Arabidopsis thaliana</i>                        | AB019232, MIL23, 33583-35070  |                                                                                      |
| AtUGT84A3           | Group L    | <i>Arabidopsis thaliana</i>                        | AL161541, 170982-172421       |                                                                                      |
| AtUGT84A4           | Group L    | <i>Arabidopsis thaliana</i>                        | AL161541, 175213-176640       |                                                                                      |
| AtUGT84B1           | Group L    | <i>Arabidopsis thaliana</i>                        | AC002391, F21P24, 58701-60071 |                                                                                      |
| AtUGT84B2           | Group L    | <i>Arabidopsis thaliana</i>                        | AC002391, F21P24, 56464-57816 |                                                                                      |
| AtUGT92A1           | Group M    | <i>Arabidopsis thaliana</i>                        | AL353013, T24H18, 21475-22941 |                                                                                      |
| AtUGT82A1           | Group N    | <i>Arabidopsis thaliana</i>                        | AP002046, MMP21, 6263-8510    |                                                                                      |
| CsUGT85K11          | Group G    | <i>Camellia sinensis (tea)</i>                     | BAO51834                      | Activity on geraniol reported by Ohgami <i>et al.</i> (2015) <sup>37</sup>           |
| CrUGT709C2 (7-DLGT) | Group P    | <i>Catharanthus roseus (Madagascar periwinkle)</i> | BAO01109.1                    | Iridoid activity reported by Asada <i>et al.</i> (2013) <sup>31</sup>                |
| GjUGT85A24          | Group G    | <i>Gardenia jasminoides (Cape jasmine)</i>         | BAK55737.1                    | Iridoid activity reported by Nagatoshi <i>et al.</i> (2011) <sup>38</sup>            |
| NbUGT79A16          | Group A    | <i>Nicotiana benthamiana</i>                       | MT945391                      |                                                                                      |
| NbUGT91A20          | Group A    | <i>Nicotiana benthamiana</i>                       | MT945398                      |                                                                                      |
| NbUGT91R10          | Group A    | <i>Nicotiana benthamiana</i>                       | MT945403                      |                                                                                      |
| NbUGT91S4           | Group A    | <i>Nicotiana benthamiana</i>                       | MT945363                      |                                                                                      |
| NbUGT94AQ1          | Group A    | <i>Nicotiana benthamiana</i>                       | MT945339                      |                                                                                      |
| NbUGT94AR1          | Group A    | <i>Nicotiana benthamiana</i>                       | MT945389                      |                                                                                      |
| NbUGT94E7           | Group A    | <i>Nicotiana benthamiana</i>                       | MT945325                      |                                                                                      |
| NbUGT94U2           | Group A    | <i>Nicotiana benthamiana</i>                       | MT945381                      |                                                                                      |
| NbUGT89D20          | Group B    | <i>Nicotiana benthamiana</i>                       | MT945364                      |                                                                                      |
| NbUGT89V1           | Group B    | <i>Nicotiana benthamiana</i>                       | MT945356                      |                                                                                      |
| NbUGT90A22          | Group C    | <i>Nicotiana benthamiana</i>                       | MT945366                      |                                                                                      |
| NbUGT90K1           | Group C    | <i>Nicotiana benthamiana</i>                       | MT945337                      |                                                                                      |
| NbUGT73A24          | Group D    | <i>Nicotiana benthamiana</i>                       | MT945326                      | High activity on geraniol (81%) reported by Sun <i>et al.</i> (2019) <sup>1</sup>    |
| NbUGT73A25          | Group D    | <i>Nicotiana benthamiana</i>                       | MT945327                      | High activity on geraniol (47%) reported by Sun <i>et al.</i> (2019) <sup>1</sup>    |
| NbUGT73A32          | Group D    | <i>Nicotiana benthamiana</i>                       | MT945371                      |                                                                                      |
| NbUGT73AB10         | Group D    | <i>Nicotiana benthamiana</i>                       | MT945365                      |                                                                                      |
| NbUGT73BY1          | Group D    | <i>Nicotiana benthamiana</i>                       | MT945354                      |                                                                                      |
| NbUGT73BZ1          | Group D    | <i>Nicotiana benthamiana</i>                       | MT945359                      |                                                                                      |
| NbUGT73E20          | Group D    | <i>Nicotiana benthamiana</i>                       | MT945362                      |                                                                                      |
| NbUGT73E21          | Group D    | <i>Nicotiana benthamiana</i>                       | MT945336                      |                                                                                      |
| NbUGT73E22          | Group D    | <i>Nicotiana benthamiana</i>                       | MT945368                      |                                                                                      |
| NbUGT73E23          | Group D    | <i>Nicotiana benthamiana</i>                       | MT945372                      |                                                                                      |
| NbUGT73Q2           | Group D    | <i>Nicotiana benthamiana</i>                       | MT945333                      |                                                                                      |
| NbUGT71A56          | Group E    | <i>Nicotiana benthamiana</i>                       | MT945345                      |                                                                                      |
| NbUGT71A57          | Group E    | <i>Nicotiana benthamiana</i>                       | MT945369                      |                                                                                      |
| NbUGT71AJ1          | Group E    | <i>Nicotiana benthamiana</i>                       | MT945347                      | Very low activity on geraniol (1%) reported by Sun <i>et al.</i> (2019) <sup>1</sup> |
| NbUGT71AT2          | Group E    | <i>Nicotiana benthamiana</i>                       | MT945342                      |                                                                                      |

| Enzyme           | Group code | Organism                     | Genbank ID | Notes                                                                                 |
|------------------|------------|------------------------------|------------|---------------------------------------------------------------------------------------|
| NbUGT71AT3       | Group E    | <i>Nicotiana benthamiana</i> | MT945324   |                                                                                       |
| NbUGT71AT4       | Group E    | <i>Nicotiana benthamiana</i> | MT945343   |                                                                                       |
| NbUGT71AT5       | Group E    | <i>Nicotiana benthamiana</i> | MT945386   |                                                                                       |
| NbUGT71AU1       | Group E    | <i>Nicotiana benthamiana</i> | MT945367   |                                                                                       |
| NbUGT71AV1       | Group E    | <i>Nicotiana benthamiana</i> | MT945376   |                                                                                       |
| NbUGT71X3        | Group E    | <i>Nicotiana benthamiana</i> | MT945350   |                                                                                       |
| NbUGT71X4        | Group E    | <i>Nicotiana benthamiana</i> | MT945358   |                                                                                       |
| NbUGT72AX1       | Group E    | <i>Nicotiana benthamiana</i> | MT945344   | Very low activity on geraniol (2%) reported by Sun <i>et al.</i> (2019) <sup>1</sup>  |
| NbUGT72AY1       | Group E    | <i>Nicotiana benthamiana</i> | MT945401   | Low activity on geraniol (23%) reported by Sun <i>et al.</i> (2019) <sup>1</sup>      |
| NbUGT72B34*G322V | Group E    | <i>Nicotiana benthamiana</i> | MT945340   | Very low activity on geraniol (11%) reported by Sun <i>et al.</i> (2019) <sup>1</sup> |
| NbUGT72B35       | Group E    | <i>Nicotiana benthamiana</i> | MT945341   | Very low activity on geraniol (1%) reported by Sun <i>et al.</i> (2019) <sup>1</sup>  |
| NbUGT72B58       | Group E    | <i>Nicotiana benthamiana</i> | MT945379   |                                                                                       |
| NbUGT78C2        | Group F    | <i>Nicotiana benthamiana</i> | MT945402   |                                                                                       |
| NbUGT85A104      | Group G    | <i>Nicotiana benthamiana</i> | MT945331   |                                                                                       |
| NbUGT85A73       | Group G    | <i>Nicotiana benthamiana</i> | MT945328   | High activity on geraniol (100%) reported by Sun <i>et al.</i> (2019) <sup>1</sup>    |
| NbUGT85A74       | Group G    | <i>Nicotiana benthamiana</i> | MT945370   | Reported as inactive by Sun <i>et al.</i> (2019) <sup>1</sup>                         |
| NbUGT76A4        | Group H    | <i>Nicotiana benthamiana</i> | MT945330   |                                                                                       |
| NbUGT76A5        | Group H    | <i>Nicotiana benthamiana</i> | MT945393   |                                                                                       |
| NbUGT87AB1       | Group J    | <i>Nicotiana benthamiana</i> | MT945378   |                                                                                       |
| NbUGT86A25       | Group K    | <i>Nicotiana benthamiana</i> | MT945374   |                                                                                       |
| NbUGT86A26       | Group K    | <i>Nicotiana benthamiana</i> | MT945380   |                                                                                       |
| NbUGT86A27       | Group K    | <i>Nicotiana benthamiana</i> | MT945388   |                                                                                       |
| NbUGT74B13       | Group L    | <i>Nicotiana benthamiana</i> | MT945360   |                                                                                       |
| NbUGT74N4        | Group L    | <i>Nicotiana benthamiana</i> | MT945323   |                                                                                       |
| NbUGT74N5        | Group L    | <i>Nicotiana benthamiana</i> | MT945334   |                                                                                       |
| NbUGT74N6        | Group L    | <i>Nicotiana benthamiana</i> | MT945361   |                                                                                       |
| NbUGT74P7        | Group L    | <i>Nicotiana benthamiana</i> | MT945332   |                                                                                       |
| NbUGT74P8        | Group L    | <i>Nicotiana benthamiana</i> | MT945355   |                                                                                       |
| NbUGT74P9        | Group L    | <i>Nicotiana benthamiana</i> | MT945405   |                                                                                       |
| NbUGT74T6        | Group L    | <i>Nicotiana benthamiana</i> | MT945322   |                                                                                       |
| NbUGT75A4        | Group L    | <i>Nicotiana benthamiana</i> | MT945348   |                                                                                       |
| NbUGT75A5        | Group L    | <i>Nicotiana benthamiana</i> | MT945351   |                                                                                       |
| NbUGT75S2        | Group L    | <i>Nicotiana benthamiana</i> | MT945353   |                                                                                       |
| NbUGT84A75       | Group L    | <i>Nicotiana benthamiana</i> | MT945384   |                                                                                       |
| NbUGT84A76       | Group L    | <i>Nicotiana benthamiana</i> | MT945395   |                                                                                       |
| NbUGT92G9        | Group M    | <i>Nicotiana benthamiana</i> | MT945373   |                                                                                       |
| NbUGT82E1        | Group N    | <i>Nicotiana benthamiana</i> | MT945399   |                                                                                       |
| NbUGT93S1        | Group O    | <i>Nicotiana benthamiana</i> | MT945346   |                                                                                       |
| NbUGT93S2        | Group O    | <i>Nicotiana benthamiana</i> | MT945394   |                                                                                       |



| Enzyme     | Group code | Organism                      | Genbank ID      | Notes                                                                       |
|------------|------------|-------------------------------|-----------------|-----------------------------------------------------------------------------|
| NbUGT93T1  | Group O    | <i>Nicotiana benthamiana</i>  | MT945352        |                                                                             |
| NbUGT93T2  | Group O    | <i>Nicotiana benthamiana</i>  | MT945357        |                                                                             |
| NbUGT93T3  | Group O    | <i>Nicotiana benthamiana</i>  | MT945382        |                                                                             |
| NbUGT93U1  | Group O    | <i>Nicotiana benthamiana</i>  | MT945375        |                                                                             |
| NbUGT709B3 | Group P    | <i>Nicotiana benthamiana</i>  | MT945392        |                                                                             |
| NbUGT709J6 | Group P    | <i>Nicotiana benthamiana</i>  | MT945329        |                                                                             |
| NbUGT709L7 | Group P    | <i>Nicotiana benthamiana</i>  | MT945349        |                                                                             |
| NbUGT709Q1 | Group P    | <i>Nicotiana benthamiana</i>  | MT945377        | Reported as inactive by Sun <i>et al.</i> (2019) <sup>1</sup>               |
| NbUGT709Q2 | Group P    | <i>Nicotiana benthamiana</i>  | MT945387        |                                                                             |
| NbUGT709U2 | Group P    | <i>Nicotiana benthamiana</i>  | MT945407        |                                                                             |
| NbUGT95F1  | undefined  | <i>Nicotiana benthamiana</i>  | MT945404        |                                                                             |
| SbUGT95B1  | undefined  | <i>Sorghum bicolor</i>        | AAF17077.1      | Activity on geraniol reported by Jones <i>et al.</i> (1999) <sup>39</sup>   |
| VvGT7      | Group E    | <i>Vitis vinifera (grape)</i> | XP_002276546    | Activity on geraniol reported by Bönisch <i>et al.</i> (2014) <sup>40</sup> |
| VvGT14     | Group G    | <i>Vitis vinifera (grape)</i> | ENA: CCB45585.1 | Activity on geraniol reported by Bönisch <i>et al.</i> (2014) <sup>40</sup> |
| VvGT16     | Group G    | <i>Vitis vinifera (grape)</i> | ENA: CCB58004.1 | Activity on geraniol reported by Bönisch <i>et al.</i> (2014) <sup>40</sup> |
| VvGT15     | Group H    | <i>Vitis vinifera (grape)</i> | ENA: CCB43518.1 | Activity on geraniol reported by Bönisch <i>et al.</i> (2014) <sup>40</sup> |

**Supplementary Table 9.** Primers used for amplification of sgRNA scaffolds from pEPOR1CB0022 Addgene#117537 which contains the sgRNA stem extension scaffold sequence first reported by Chen *et al. Cell* 155(7):1479–91 (2013)<sup>41</sup>. Details of the U6-promoter and L1 acceptor that the resulting PCR amplicon was assembled with are also provided.

| Construct Name | sgRNA # | target UGT                                                                | L1 acceptor                              | U6 Promoter                                        | F primer                                                         | R primer                                                     |
|----------------|---------|---------------------------------------------------------------------------|------------------------------------------|----------------------------------------------------|------------------------------------------------------------------|--------------------------------------------------------------|
| pEPQDPKN0361   | 2       | NbUGT85104                                                                | Position 2<br>pICH47742<br>Addgene#48001 | pICSL90002<br>(U6-26, A thaliana)<br>Addgene#68261 | tgtGGTCTctattgTGATA<br>TGAAAGCCTCGTATAg<br>tttaagagctatgctggaaac | tGGTCTctagcgaaaa<br>aaagcaccgact (for all<br>amplifications) |
|                | 3       | NbUGT85A73                                                                | Position 3<br>pICH47751<br>Addgene#48002 | pEPQD0CM0032<br>(pUAP-NbU6-1)<br>Addgene#185623    | tgtGGTCTctttgACCCG<br>TCTCGTGCATCGTGTg<br>tttaagagctatgctggaaac  |                                                              |
|                | 4       | NbUGT85A74                                                                | Position 4<br>pICH47761<br>Addgene#48003 | pEPQD0CM0033<br>(pUAP-NbU6-2)<br>Addgene#185624    | tgtGGTCTctctcAGAG<br>GACCTTATTCTCTTAA<br>gttaagagctatgctggaaac   |                                                              |
|                | 6       | NbUGT85A73                                                                | Position 6<br>pICH47781<br>Addgene#48005 | pICSL90002<br>(U6-26, A thaliana)<br>Addgene#68261 | tgtGGTCTctattCGTGG<br>CCCTGATTCTCTCAA<br>tttaagagctatgctggaaac   |                                                              |
|                | 7       | NbUGT85104                                                                | Position 7<br>pICH47791<br>Addgene#48006 | pEPQD0CM0032<br>(pUAP-NbU6-1)<br>Addgene#185623    | tgtGGTCTctttcgTGTG<br>CGCGTCATCGTTAGA<br>gttaagagctatgctggaaac   |                                                              |
|                | 1       | NbUGT85A74                                                                | Position 1<br>pICH47732<br>Addgene#48000 | pICSL90002<br>(U6-26, A thaliana)<br>Addgene#68261 | tgtGGTCTctattGAGAAA<br>TGGGTTCTGTTGAAGt<br>taagagctatgctggaaac   |                                                              |
| pEPQDPKN0720   | 2       | NbUGT73Q2                                                                 | Position 2<br>pICH47742<br>Addgene#48001 | pICSL90002<br>(U6-26, A thaliana)<br>Addgene#68261 | tgtGGTCTctattGTTGAC<br>GTTGCAGCCCAAGCTgtt<br>taagagctatgctggaaac |                                                              |
|                | 3       | NbUGT73A24<br>and<br>NbUGT73A25<br>and<br>(NbUGT73A32 -<br>2 bp mismatch) | Position 3<br>pICH47751<br>Addgene#48002 | pEPQD0CM0032<br>(pUAP-NbU6-1)<br>Addgene#185623    | tgtGGTCTcttcGTGCCA<br>TGAAAACATATTCTgttt<br>aagagctatgctggaaac   |                                                              |
|                | 4       | NbUGT73A24<br>and<br>NbUGT73A32<br>(NbUGT73A25 -<br>2 bp mismatch)        | Position 4<br>pICH47761<br>Addgene#48003 | pEPQD0CM0033<br>(pUAP-NbU6-2)<br>Addgene#185624    | tgtGGTCTcttcGCTGC<br>AGAATCAGTAGTCCA<br>tttaagagctatgctggaaac    |                                                              |
|                | 6       | NbUGT73A24<br>and<br>NbUGT73A25<br>and<br>(NbUGT73A32 -<br>1 bp mismatch) | Position 6<br>pICH47781<br>Addgene#48005 | pICSL90002<br>(U6-26, A thaliana)<br>Addgene#68261 | tgtGGTCTctattTTAAT<br>TTCGTGAGGCAAATTg<br>tttaagagctatgctggaaac  |                                                              |
|                | 7       | NbUGT73Q2                                                                 | Position 7<br>pICH47791<br>Addgene#48006 | pEPQD0CM0032<br>(pUAP-NbU6-1)<br>Addgene#185623    | tgtGGTCTcttcGAGAAT<br>TTAGGTGCGTTGAGgtt<br>taagagctatgctggaaac   |                                                              |
|                | 1       | NbUGT73A24<br>and<br>NbUGT73A25                                           | Position 1<br>pICH47732<br>Addgene#48000 | pICSL90002<br>(U6-26, A thaliana)<br>Addgene#68261 | tgtGGTCTctattGACCTT<br>CGCCATGTCTAGTGTg<br>tttaagagctatgctggaaac |                                                              |
| pEPQDPKN0724   | 2       | NbUGT72B34<br>and<br>NbUGT72B35<br>and<br>(NbUGT72B58 -<br>1 bp mismatch) | Position 2<br>pICH47742<br>Addgene#48001 | pICSL90002<br>(U6-26, A thaliana)<br>Addgene#68261 | tgtGGTCTctattTGAGC<br>TTGTGGGGCCAATT<br>gtttaaagagctatgctggaaac  |                                                              |
|                | 3       | NbUGT72AY1                                                                | Position 3<br>pICH47751<br>Addgene#48002 | pEPQD0CM0032<br>(pUAP-NbU6-1)<br>Addgene#185623    | tgtGGTCTcttcGAAAAC<br>CACTCTACCAATGgtt<br>taagagctatgctggaaac    |                                                              |
|                | 4       | NbUGT72AX1                                                                | Position 4<br>pICH47761<br>Addgene#48003 | pEPQD0CM0033<br>(pUAP-NbU6-2)<br>Addgene#185624    | tgtGGTCTcttcGGATG<br>ATGTGTCCCATGCCAg<br>tttaagagctatgctggaaac   |                                                              |
|                | 6       | NbUGT72AY1                                                                | Position 6<br>pICH47781<br>Addgene#48005 | pICSL90002<br>(U6-26, A thaliana)<br>Addgene#68261 | tgtGGTCTctattGTTG<br>CCTAAGACTAGAACTg<br>tttaagagctatgctggaaac   |                                                              |
|                | 7       | NbUGT72B34<br>and<br>NbUGT72B35                                           | Position 7<br>pICH47791<br>Addgene#48006 | pEPQD0CM0032<br>(pUAP-NbU6-1)<br>Addgene#185623    | tgtGGTCTcttcGTTTCA<br>ATTTTAACATCAAGgttt<br>aagagctatgctggaaac   |                                                              |
|                | 1       | NbUGT72B58                                                                | Position 1<br>pICH47732<br>Addgene#48000 | pICSL90002<br>(U6-26, A thaliana)<br>Addgene#68261 | tgtGGTCTctattTTAGA<br>GATGGGACCGTTAGT<br>gtttaaagagctatgctggaaac |                                                              |

**Supplementary Table 10.** Primers used for construction of mobile single guide RNA plasmid vectors. pEPQDKN0761 (Addgene #185630) containing an sgRNA fused to truncated flowering locus T was used as a PCR template.

| Construct   | Target UGT                      | Position in final construct | F Primer                                                            | R Primer                                                                           |
|-------------|---------------------------------|-----------------------------|---------------------------------------------------------------------|------------------------------------------------------------------------------------|
| pEPQDKN0777 | NbUGT71AT3                      | 1                           | aCGTCTCgcaggcacctgcaacgAAACTTT<br>TGAACACCATAGTCTAAgtttagagctag     | tCGTCTCccgagtcacctgctagtGCACgctca<br>acacgtaccggccgcgattggccataagtaaccttt<br>agagt |
|             | NbUGT74P7                       | 2                           | aCGTCTCgcaggcacctgcaacgGTGCGAT<br>TTATGTGGCCTTGTGCGgttttagagctag    | tCGTCTCccgagtcacctgctagtCCTGgctca<br>acacgtaccggccgcgattggccataagtaaccttt<br>agagt |
|             | NbUGT90K1                       | 3                           | aCGTCTCgcaggcacctgcaacgCAGGGGT<br>GGCGCAAAGGGCCGCGgttttagagcta<br>g | tCGTCTCccgagtcacctgctagtCACTttggcc<br>ataagtaaccttt                                |
| pEPQDKN0778 | NbUGT71A56                      | 1                           | aCGTCTCgcaggcacctgcaacgAAACTCA<br>CCTTGTAACCCACTGTGGgttttagagctag   | tCGTCTCccgagtcacctgctagtGCACgctca<br>acacgtaccggccgcgattggccataagtaaccttt<br>agagt |
|             | NbUGT73E22                      | 2                           | aCGTCTCgcaggcacctgcaacgGTGCATC<br>GCGCAGTGTCAATCATAgtttagagctag     | tCGTCTCccgagtcacctgctagtCCTGgctca<br>acacgtaccggccgcgattggccataagtaaccttt<br>agagt |
|             | NbUGT93T3                       | 3                           | aCGTCTCgcaggcacctgcaacgCAGGGTA<br>AACAGGAAGACCATAAGgttttagagctag    | tCGTCTCccgagtcacctgctagtCACTttggcc<br>ataagtaaccttt                                |
| pEPQDKN0779 | NbUGT73BY1                      | 1                           | aCGTCTCgcaggcacctgcaacgAAACCCA<br>CACCTCTCAATGCCCAAgtttagagctag     | tCGTCTCccgagtcacctgctagtGCACgctca<br>acacgtaccggccgcgattggccataagtaaccttt<br>agagt |
|             | NbUGT74N6                       | 2                           | aCGTCTCgcaggcacctgcaacgGTGCCTA<br>CAAAGCGAAAGCTTCGgttttagagctag     | tCGTCTCccgagtcacctgctagtCCTGgctca<br>acacgtaccggccgcgattggccataagtaaccttt<br>agagt |
|             | NbUGT71A57                      | 3                           | aCGTCTCgcaggcacctgcaacgCAGGCTT<br>ATGACCGCAATAAACCGgttttagagctag    | tCGTCTCccgagtcacctgctagtCACTttggcc<br>ataagtaaccttt                                |
| pEPQDKN0780 | NbUGT74T6                       | 1                           | aCGTCTCgcaggcacctgcaacgAAACGTA<br>TCGATACCATTCCGATgttttagagctag     | tCGTCTCccgagtcacctgctagtGCACgctca<br>acacgtaccggccgcgattggccataagtaaccttt<br>agagt |
|             | NbUGT74N4                       | 2                           | aCGTCTCgcaggcacctgcaacgGTGCCAT<br>AAACTATGCAATTCACAgtttagagctag     | tCGTCTCccgagtcacctgctagtCCTGgctca<br>acacgtaccggccgcgattggccataagtaaccttt<br>agagt |
|             | NbUGT94E7                       | 3                           | aCGTCTCgcaggcacctgcaacgCAGGCTA<br>AGGGCGTGATTGAGATGgttttagagctag    | tCGTCTCccgagtcacctgctagtCACTttggcc<br>ataagtaaccttt                                |
| pEPQDKN0781 | NbUGT85A73                      | 1                           | aCGTCTCgcaggcacctgcaacgAAACCGT<br>GGCCCTGATTCTCTCAAgtttagagctag     | tCGTCTCccgagtcacctgctagtGCACgctca<br>acacgtaccggccgcgattggccataagtaaccttt<br>agagt |
|             | NbUGT73A24<br>and<br>NbUGT73A25 | 2                           | aCGTCTCgcaggcacctgcaacgGTGCAGC<br>TTCGCCATGTCTAGTGTgttttagagctag    | tCGTCTCccgagtcacctgctagtCCTGgctca<br>acacgtaccggccgcgattggccataagtaaccttt<br>agagt |
|             | NbUGT72AY1                      | 3                           | aCGTCTCgcaggcacctgcaacgCAGGGGT<br>TGCCCTAAGACTAGAACTgttttagagctag   | tCGTCTCccgagtcacctgctagtCACTttggcc<br>ataagtaaccttt                                |

**Supplementary Table 11.** Primers used for genotyping plants with Cas9-induced mutations. (A) Primers used for PCR amplification and sequencing of UGT target genes (B) Primers used for ddPCR amplification to determine T-DNA copy number. Asterisk indicates phosphorothioate bond.

A

| UGT                      | Group | Sequencing primer (forward)     | Sequencing primer (reverse)  | Sequencing primer (alternate rev.) |
|--------------------------|-------|---------------------------------|------------------------------|------------------------------------|
| NbUGT85A73               | G     | caactcaaatcaactgtgaatttcc       | gggagcagcctatatatgctgg       |                                    |
| NbUGT85A74               |       | aattgaaaatattgtctatcgaaagagg    | aataccattgttatcactgtatctg    |                                    |
| NbUGT85A104              |       | cmetaactgccttgaacaatc           | cgtaccttctactggacaataacc     |                                    |
| NbUGT73A24               | D     | tctatttctgccactaaagcagg         | tccactgaatcgaaccaaca*c       | ctctccccagatcgctc*g                |
| NbUGT73A25               |       | acacagcttacttttcttctgctac       | gttctcaaacctcagtcactaact*c   | tctctccccagattgctc*a               |
| NbUGT73Q2                |       | ctactgcagtttttcttctcatcag       | gaactcctatcttaaaatctctacgagc |                                    |
| NbUGT73A32               |       | aataagaactgaaactacatctagcagtagc | atataagtcataatcttcatgccattg  | tgactgactcttcatccgatag*g           |
| NbUGT72B34*G322V         | E     | cctccctctaactctattgctat*c       | cagaagtagacacatacagttggc     | gaatctgaatcgggtcaggtaag            |
| NbUGT72B35               |       | cgcaataaatcagcgtaattttactag     | gcacaataactaccagcttagaacaac  | tgaaccgggtcgggttacc                |
| NbUGT72AX1               |       | taattaaacaaatcgacacacagtagc     | atccaggagttgaaataggttc*g     |                                    |
| NbUGT72B58 (first exon)  |       | aagaaaagtctgtttagcaagcag        | ggccagaagtccttgcct*c         |                                    |
| NbUGT72B58 (second exon) |       | ccctctcaatacactggatcag          | acaagaacaaaacccatgtgctag     |                                    |
| NbUGT72AY1               |       | gtagttgtgaaattgttatggcttc       | cgaattgtaacattacctgcattc     |                                    |
| NbUGT71AT3               | E     | gatgaatgaactaatttctcctttag      | ggaacaatctcagaatccattaagc    |                                    |
| NbUGT74P7                | L     | ftagtacataaaagatgacatggtg       | aaggcaacgaaacaggaacag        |                                    |
| NbUGT90K1                | C     | actgctatatacataagaccgcttc       | gaaaacgtaaaaggcacgctg        |                                    |
| NbUGT71A56               | E     | caaacatccactgcaacatagtc         | cataactgggatccaaactcg        |                                    |
| NbUGT73E22               | D     | gtatcaacaatggctgtgtca*g         | gaatgttaaatgtggcaaca*c       |                                    |
| NbUGT93T3                | O     | ctctatgggtagctgtgagaattac       | ttaagcaattctcctcaagttg*g     |                                    |
| NbUGT73BY1               | D     | caaatcccttaataaaaaatccatgc      | tgaactcaactctgtgtggca*c      |                                    |
| NbUGT74N6                | L     | ctcctattcataattggccatag         | aattgattaccaacattcaagt*g     |                                    |
| NbUGT71A57               | E     | gcaaagaagaaaatggaagatcaag       | acgactcctatcaagaaatgtgtg     |                                    |
| NbUGT74T6                | L     | attttagctcttctatccaagcc         | ttaacaccaactcaaaatcagctg     |                                    |
| NbUGT74N4                | L     | gcttgatctgcatatccagt*g          | ggtacatctgaactctcaattgacttg  |                                    |
| NbUGT94E7                | A     | catggatacacaagtaatagaatggt      | tcttttcttagctgatttggc        |                                    |

B

| gene                                        | ddPCR primer (forward) | ddPCR primer (reverse) |
|---------------------------------------------|------------------------|------------------------|
| <i>nptII</i>                                | cctgccgagaagatccat     | tcttctccagatcatcctg    |
| <i>N. benthamiana Rdr1</i> (reference gene) | gttacgccatcatgtgtg     | cagagttcaatttgcagca    |

## Supplementary References

1. Sun, G. *et al.* Glucosylation of the phytoalexin N-feruloyl tyramine modulates the levels of pathogen-responsive metabolites in *Nicotiana benthamiana*. *Plant J.* **100**, 20–37 (2019).
2. Louveau, T. & Osbourn, A. The sweet side of plant-specialized metabolism. *Cold Spring Harb. Perspect. Biol.* **11**, a034744 (2019).
3. Thodberg, S. *et al.* Elucidation of the amygdalin pathway reveals the metabolic basis of bitter and sweet almonds (*Prunus dulcis*). *Plant Physiol.* **178**, 1096–1111 (2018).
4. Noguchi, A. *et al.* Local differentiation of sugar donor specificity of flavonoid glycosyltransferase in Lamiales. *Plant Cell* **21**, 1556–1572 (2009).
5. Shibuya, M., Nishimura, K., Yasuyama, N. & Ebizuka, Y. Identification and characterization of glycosyltransferases involved in the biosynthesis of soyasaponin I in *Glycine max*. *FEBS Lett.* **584**, 2258–2264 (2010).
6. Caputi, L., Lim, E.-K. & Bowles, D. J. Discovery of new biocatalysts for the glycosylation of terpenoid scaffolds. *Chemistry* **14**, 6656–6662 (2008).
7. Lim, E.-K., Ashford, D. A., Hou, B., Jackson, R. G. & Bowles, D. J. Arabidopsis glycosyltransferases as biocatalysts in fermentation for regioselective synthesis of diverse quercetin glucosides. *Biotechnol. Bioeng.* **87**, 623–631 (2004).
8. Lim, E.-K. *et al.* The activity of Arabidopsis glycosyltransferases toward salicylic acid, 4-hydroxybenzoic acid, and other benzoates. *J. Biol. Chem.* **277**, 586–592 (2002).
9. Poppenberger, B. *et al.* The UGT73C5 of Arabidopsis thaliana glucosylates brassinosteroids. *Proc. Natl. Acad. Sci. U. S. A.* **102**, 15253–15258 (2005).
10. Noguchi, A. *et al.* A UDP-glucose:Isoflavone 7-O-glucosyltransferase from the roots of soybean (*Glycine max*) seedlings. *J. Biol. Chem.* **282**, 23581–23590 (2007).
11. Jugdé, H., Nguy, D., Moller, I., Cooney, J. M. & Atkinson, R. G. Isolation and characterization of a novel glycosyltransferase that converts phloretin to phlorizin, a potent antioxidant in apple. *FEBS J.* **275**, 3804–3814 (2008).
12. Hou, B., Lim, E.-K., Higgins, G. S. & Bowles, D. J. N-glucosylation of cytokinins by glycosyltransferases of Arabidopsis thaliana. *J. Biol. Chem.* **279**, 47822–47832 (2004).
13. Hansen, K. S. *et al.* The in vitro substrate regiospecificity of recombinant UGT85B1, the cyanohydrin glucosyltransferase from *Sorghum bicolor*. *Phytochemistry* **64**, 143–151 (2003).
14. Jing, T. *et al.* UGT85A53 promotes flowering via mediating abscisic acid glucosylation and FLC transcription in *Camellia sinensis*. *J. Exp. Bot.* **71**, 7018–7029 (2020).
15. Olsson, K. *et al.* Microbial production of next-generation stevia sweeteners. *Microb. Cell Fact.* **15**, 207 (2016).
16. Lim, E.-K., Higgins, G. S., Li, Y. & Bowles, D. J. Regioselectivity of glucosylation of caffeic acid by a UDP-glucose:glucosyltransferase is maintained in planta. *Biochem. J.* **373**, 987–992 (2003).
17. Jackson, R. G. *et al.* Identification and biochemical characterization of an Arabidopsis indole-3-acetic acid glucosyltransferase. *J. Biol. Chem.* **276**, 4350–4356 (2001).
18. Závěská Drábková, L., Honys, D. & Motyka, V. Evolutionary diversification of cytokinin-specific glucosyltransferases in angiosperms and enigma of missing cis-zeatin O-glucosyltransferase gene in Brassicaceae. *Sci. Rep.* **11**, 7885 (2021).
19. Rai, A., Smita, S. S., Singh, A. K., Shanker, K. & Nagegowda, D. A. Heteromeric and homomeric geranyl diphosphate synthases from *Catharanthus roseus* and their role in monoterpene indole alkaloid biosynthesis. *Mol. Plant* **6**, 1531–1549 (2013).
20. Simkin, A. J. *et al.* Characterization of the plastidial geraniol synthase from Madagascar periwinkle which initiates the monoterpene branch of the alkaloid pathway in internal phloem associated parenchyma. *Phytochemistry* **85**, 36–43 (2013).
21. Collu, G. *et al.* Geraniol 10-hydroxylase, a cytochrome P450 enzyme involved in terpenoid indole alkaloid biosynthesis. *FEBS Lett.* **508**, 215–220 (2001).
22. Miettinen, K. *et al.* The seco-iridoid pathway from *Catharanthus roseus*. *Nature Communications* vol. 5 (2014).
23. Krithika, R. *et al.* Characterization of 10-hydroxygeraniol dehydrogenase from *Catharanthus roseus* reveals cascaded enzymatic activity in iridoid biosynthesis. *Sci. Rep.* **5**, 8258 (2015).

24. Geu-Flores, F. *et al.* An alternative route to cyclic terpenes by reductive cyclization in iridoid biosynthesis. *Nature* **492**, 138–142 (2012).
25. Chalfie, M., Tu, Y., Euskirchen, G., Ward, W. W. & Prasher, D. C. Green Fluorescent Protein as a Marker for Gene Expression. *Science* **263**, 802–805 (1994).
26. Reed, J. *et al.* A translational synthetic biology platform for rapid access to gram-scale quantities of novel drug-like molecules. *Metab. Eng.* **42**, 185–193 (2017).
27. Schmidt, A. *et al.* A bifunctional geranyl and geranylgeranyl diphosphate synthase is involved in terpene oleoresin formation in *Picea abies*. *Plant Physiol.* **152**, 639–655 (2010).
28. Lichman, B. R. *et al.* The evolutionary origins of the cat attractant nepetalactone in catnip. *Sci. Adv.* **6**, eaba0721 (2020).
29. Lichman, B. R. *et al.* Uncoupled activation and cyclization in catmint reductive terpenoid biosynthesis. *Nat. Chem. Biol.* **15**, 71–79 (2019).
30. Salim, V., Wiens, B., Masada-Atsumi, S., Yu, F. & De Luca, V. 7-deoxyloganetic acid synthase catalyzes a key 3 step oxidation to form 7-deoxyloganetic acid in *Catharanthus roseus* iridoid biosynthesis. *Phytochemistry* **101**, 23–31 (2014).
31. Asada, K. *et al.* A 7-deoxyloganetic acid glucosyltransferase contributes a key step in secologanin biosynthesis in Madagascar periwinkle. *Plant Cell* **25**, 4123–4134 (2013).
32. Murata, J., Roepke, J., Gordon, H. & De Luca, V. The leaf epidermome of *Catharanthus roseus* reveals its biochemical specialization. *Plant Cell* **20**, 524–542 (2008).
33. Irmiler, S. *et al.* Indole alkaloid biosynthesis in *Catharanthus roseus*: new enzyme activities and identification of cytochrome P450 CYP72A1 as secologanin synthase. *Plant J.* **24**, 797–804 (2008).
34. De Luca, V., Marineau, C. & Brisson, N. Molecular cloning and analysis of cDNA encoding a plant tryptophan decarboxylase: comparison with animal dopa decarboxylases. *Proc. Natl. Acad. Sci. U. S. A.* **86**, 2582–2586 (1989).
35. Pasquali, G. *et al.* Coordinated regulation of two indole alkaloid biosynthetic genes from *Catharanthus roseus* by auxin and elicitors. *Plant Mol. Biol.* **18**, 1121–1131 (1992).
36. Yauk, Y.-K. *et al.* Manipulation of flavour and aroma compound sequestration and release using a glycosyltransferase with specificity for terpene alcohols. *Plant J.* **80**, 317–330 (2014).
37. Ohgami, S. *et al.* Volatile glycosylation in tea plants: Sequential glycosylations for the biosynthesis of aroma  $\beta$ -primeverosides are catalyzed by two *Camellia sinensis* glycosyltransferases. *Plant Physiol.* **168**, 464–477 (2015).
38. Nagatoshi, M., Terasaka, K., Nagatsu, A. & Mizukami, H. Iridoid-specific glucosyltransferase from *Gardenia jasminoides*. *J. Biol. Chem.* **286**, 32866–32874 (2011).
39. Jones, P. R., Møller, B. L. & Høj, P. B. The UDP-glucose:P-hydroxymandelonitrile-O-glucosyltransferase that catalyzes the last step in synthesis of the cyanogenic glucoside dhurrin in sorghum bicolor. *J. Biol. Chem.* **274**, 35483–35491 (1999).
40. Bönisch, F. *et al.* A UDP-glucose:Monoterpenol glucosyltransferase adds to the chemical diversity of the grapevine metabolome. *Plant Physiol.* **165**, 561–581 (2014).
41. Chen, B. *et al.* Dynamic imaging of genomic loci in living human cells by an optimized CRISPR/Cas system. *Cell* **155**, 1479–1491 (2013).
