# Supplementary material for: Reconstitution of monoterpene indole alkaloid biosynthesis in genome engineered Nicotiana benthamiana
Source: PubMed Central journal article supplement (PMC9464250; doi:10.1038/s42003-022-03904-w), 2022-09-10
Supplement: 42003_2022_3904_MOESM2_ESM.pdf [file 42003_2022_3904_MOESM2_ESM.pdf]

## Description of Additional Supplementary Files

**File name:** Supplementary Data 1

**Description:** Numerical source data for graphs in Figures 3, 5, 6 and Supplementary Figures 6, 7 and 13
